1 CAENORHABDITIS ELEGANS JUNCTOPHILIN HAS TISSUE-SPECIFIC FUNCTIONS AND REGULATES  
2 NEUROTRANSMISSION WITH EXTENDED-SYNAPTOTAGMIN

3

4

5 Christopher A. Piggott<sup>1</sup>, Zilu Wu<sup>1</sup>, Stephen Nurrish<sup>3,4</sup>, Suhong Xu<sup>1#</sup>, Joshua M. Kaplan<sup>3,4</sup>,  
6 Andrew D. Chisholm<sup>1</sup>, Yishi Jin<sup>1,2</sup>

7

8 <sup>1</sup> Section of Neurobiology, Division of Biological Sciences, University of California San Diego, La  
9 Jolla, California 92093

10 <sup>2</sup> Department of Cellular and Molecular Medicine, School of Medicine, University of California  
11 San Diego, La Jolla, California 92093

12 <sup>3</sup> Department of Molecular Biology, Massachusetts General Hospital, Boston, Massachusetts  
13 02114

14 <sup>4</sup> Department of Neurobiology, Harvard Medical School, Boston, Massachusetts 02115

15 # Present address: Center for stem cell and regenerative medicine and Department of  
16 Cardiology of the second affiliated hospital, Zhejiang University School of Medicine, Hangzhou  
17 310058 China

18

19 **Running title**

20 Tissue-specific functions of *jph-1*

21

22 **Keywords**

23 membrane contact site, *esyt-2*, ryanodine receptor/*unc-68*, VGCC/*egl-19*

24 **Corresponding author**

25 [yijin@ucsd.edu](mailto:yijin@ucsd.edu)

26

27 **Abstract**

28 The junctophilin family of proteins tether together plasma membrane (PM) and endoplasmic  
29 reticulum (ER) membranes, and couple PM- and ER-localized calcium channels. Understanding  
30 *in vivo* functions of junctophilins is of great interest for dissecting the physiological roles of ER-  
31 PM contact sites. Here, we show that the sole *C. elegans* junctophilin JPH-1 localizes to discrete  
32 membrane contact sites in neurons and muscles and has important tissue-specific functions.  
33 *jph-1* null mutants display slow growth and development due to weaker contraction of  
34 pharyngeal muscles, leading to reduced feeding. In the body wall muscle, JPH-1 co-localizes  
35 with the PM-localized EGL-19 voltage-gated calcium channel and ER-localized UNC-68/RyR  
36 calcium channel, and is required for animal movement. We also find an unexpected cell non-  
37 autonomous effect of *jph-1* in axon regrowth after injury. In neurons, JPH-1 co-localizes with  
38 the membrane contact site protein Extended-SYnptoTagmin 2 (ESYT-2) and modulates  
39 neurotransmission. Interestingly, *jph-1* and *esyt-2* null mutants display mutual suppression in  
40 their response to aldicarb, suggesting that JPH-1 and ESYT-1 have antagonistic roles in  
41 neuromuscular synaptic transmission. Our genetic double mutant analysis also reveals that *jph-*  
42 *1* functions in overlapping pathways with two PM-localized voltage-gated calcium channels, *egl-*  
43 *19* and *unc-2*, and *unc-68/RyR* for animal health and development. Finally, we show that *unc-*  
44 *68/RyR* is required for JPH-1 localization to ER-PM puncta. Our data demonstrate important  
45 roles for junctophilin in cellular physiology, and also provide insights into how junctophilin  
46 functions together with other calcium channels *in vivo*.

## 47 Introduction

48 Membrane contact sites (MCSs) are regions of close contact, generally within 10 to 30 nm  
49 between organelles or between an organelle and the plasma membrane (PM). MCSs were first  
50 described between the endoplasmic reticulum (ER) and PM in muscle cells by electron  
51 microscopy over 60 years ago (Porter and Palade, 1957). MCSs have now been found for most  
52 organelles in many organisms (Lang et al., 2015; Valm et al., 2017). MCSs are maintained by  
53 protein tethers that bind to opposing membranes simultaneously and hold them in close  
54 proximity. Different types of MCSs are organized by distinct protein tethers, many of which are  
55 conserved from yeast to mammals (Phillips and Voeltz, 2016). Recent studies have begun to  
56 uncover their functions. For example, oxysterol-binding proteins (OSBPs) facilitate exchange of  
57 PM-localized phosphatidylinositol 4-phosphate (PI4P) for ER-localized cholesterol (Mesmin et  
58 al., 2013), and binding of ER-localized calcium sensor Stim1 to PM-localized calcium channel  
59 Orai1 triggers the entry of extracellular calcium to the ER to replenish calcium stores (Hirve et  
60 al., 2018). Genetic analysis suggests many MCS tethering proteins act redundantly. For  
61 example, studies of ER-PM contact sites in yeast showed that full separation of the ER from the  
62 PM is only achieved when six genes encoding MCS proteins are deleted (Manford et al., 2012).  
63 Similarly, in *C. elegans*, enlarged lysosomes and endosomes were observed only when knocking  
64 out all four *obr* genes encoding OSBP homologs (Kobuna et al., 2010). It is thus necessary to  
65 identify new experimental models or paradigms to tease apart the functions of individual MCS  
66 proteins and to dissect their interaction network *in vivo*.

67 The junctophilin (JPH) family of proteins were first identified based on their localization  
68 to muscle ER-PM contact sites in a screen using monoclonal antibodies raised against ER  
69 vesicles enriched for ER-PM junctions (Takeshima et al., 2000). Junctophilins are characterized  
70 by a N-terminal domain consisting of eight membrane occupation and recognition nexus  
71 (MORN) motifs, which bind to the PM, and a C-terminal transmembrane domain, which anchors  
72 the protein to the ER. Mammals have four junctophilins (JPH1 through 4) that are differentially  
73 expressed in excitable cells. JPH1 and JPH2 are expressed in skeletal and cardiac muscle (Nishi  
74 et al., 2000; Takeshima et al., 2000) and the smooth muscle surrounding arteries (Pritchard et  
75 al., 2019; Saeki et al., 2019). JPH3 and JPH4 are broadly expressed in neurons of the brain and

76 many parts of the nervous system (Nishi et al., 2003, 2000; Takeshima et al., 2000). Studies of  
77 genetic knockout mice have provided some evidence for their functions. Cardiomyocytes from  
78 JPH2 knockout mice have fewer ER-PM contacts, and skeletal muscle from JPH1 knockout mice  
79 have abnormal ER morphology and fewer ER-PM contacts (Ito et al., 2001; Takeshima et al.,  
80 2000). In addition to tethering together ER and PM membranes, junctophilins bind to ER- and  
81 PM-localized calcium channels and facilitate their co-localization at ER-PM contact sites in  
82 mouse cardiomyocytes, skeletal muscle, and cultured hippocampal neurons (Nakada et al.,  
83 2018; Sahu et al., 2019; Van Oort et al., 2011). Junctophilin-mediated ER-PM coupling is  
84 reported to promote efficient excitation-contraction in heart and skeletal muscle (Ito et al.,  
85 2001; Nakada et al., 2018; Takeshima et al., 2000; Van Oort et al., 2011) and regulate action  
86 potential frequency in neurons (Kakizawa et al., 2007; Moriguchi et al., 2006; Sahu et al., 2019).  
87 Unlike mammals, invertebrates have a single junctophilin (Garbino et al., 2009). In *D.*  
88 *melanogaster*, the sole junctophilin was shown to have roles in muscle contraction and neural  
89 development (Calpena et al., 2018).

90 *C. elegans* has a single junctophilin gene named *jph-1* (Garbino et al., 2009; Yoshida et  
91 al., 2001). Here we show that JPH-1 protein localizes to punctate structures in muscles and  
92 neurons. In muscles, JPH-1 puncta co-localize with the ER-localized UNC-68/RyR calcium  
93 channel and PM-localized EGL-19/Cav1 calcium channel. In neurons JPH-1 puncta co-localize  
94 with the ER-PM contact site protein extended-synaptotagmin 2 (ESYT-2). Through  
95 characterization of *jph-1* null mutants and tissue-specific rescue experiments, we defined  
96 tissue-specific roles of *jph-1*. In the pharynx muscle, *jph-1* is required for the pumping that  
97 drives animal feeding and contributes to animal growth. In the body wall muscle, *jph-1* is  
98 required for animal movement. We observed a cell non-autonomous effect of *jph-1* in axon  
99 regeneration after injury. Additionally, *jph-1* modulates synaptic transmission, and can balance  
100 the effects of *esyt-2*. Genetic double mutant analyses reveal differential interactions between  
101 *jph-1* and the ER-localized *unc-68*/RyR calcium channel and two PM-localized voltage-gated  
102 calcium channels (VGCCs) for animal development and health. Lastly, we show that precise  
103 localization of JPH-1 in both neurons and muscles depends on *unc-68*. These data support  
104 critical roles of junctophilin in cellular function and animal development.

## 105 **Materials and methods**

### 106 ***C. elegans* genetics**

107 Wild-type *C. elegans* is the N2 Bristol variant (Brenner, 1974). Strains were maintained under  
108 standard conditions on Nematode Growth Media (NGM) plates seeded with *E. coli* OP50  
109 bacteria. New strains were constructed using standard procedures, based on a combination of  
110 visual identification of phenotypes, such as uncoordinated (Unc) movement, and genotyping for  
111 specific alleles. Strains and primers for genotyping are shown in the reagents table.

### 112 **Molecular biology and transgenesis**

113 We cloned *jph-1* cDNAs from wild-type N2 mRNAs, first using primers YJ12558 5'-  
114 GACGTAGGTGTGTCAGCAG-3' and YJ12559 5'- CCTGAGGAGAAGTGTGTCTG-3' in the 5'UTR and  
115 3'UTR of *jph-1*, followed by a second round of amplification using primers YJ12560 5'-  
116 ATGAATGGAGGCAGATTTGAC-3' and YJ12561 5'-CTACGAAGAAGACTTCTTCTTCTTC-3' targeting  
117 the start and stop codons. We obtained two amplified products, which were cloned into pCR8  
118 vectors. Sanger sequencing analysis of these clones revealed a 2.2 kb cDNA encoding JPH-1  
119 isoform A, and a 2.4 kb cDNA encoding JPH-1 isoform B. The coding region of JPH-1B was then  
120 amplified using primers YJ12560 5'-ATGAATGGAGGCAGATTTGAC-3' and YJ12562 5'-  
121 CTAATATGTGAGGGTGTGTACCG-3' and cloned into a pCR8 vector. The 4.5 kb *jph-1* promoter  
122 was amplified from wild-type genomic DNA using the primers YJ12563 5'-  
123 TGTCTGCCATTACCAGCCCG-3' and YJ12564 5'- TTCCATTTGCCGTACTGCTG -3'. All expression  
124 constructs were generated either by Gateway recombination (Invitrogen / Thermo Fisher  
125 Scientific), Gibson assembly (New England Biolabs), or restriction enzyme digest and ligation. All  
126 expression clones were sequenced to ensure sequence fidelity.

127 We generated transgenic lines by microinjection, as described (Mello et al., 1991). Plasmids,  
128 fosmids, co-injection markers, and injection concentrations are listed in the reagents table.

129 Single-copy insertion transgenes with *ju* designation were generated on Chromosome IV at  
130 cxTi10882, following a previously published protocol (Andrusiak et al., 2019). Briefly, we  
131 injected N2 hermaphrodites with four plasmids, one containing GFP-cDNA flanked by homology

132 arms and expressing a hygromycin resistance gene (HygR), pCZGY2750 expressing Cas9 and an  
133 sgRNA targeting cxTi10882, and pCFJ90 Pmyo-2-mCherry (Addgene plasmid 19327) and  
134 pCFJ104 Pmyo-3-mCherry (Addgene plasmid 19328)(Frøkjær-Jensen et al., 2008) as co-injection  
135 markers. F1 animals from injected P0 parents were treated with hygromycin (Hyg). Among the  
136 survivors, we looked for the absence of co-injections markers to identify animals with genomic  
137 insertion, which was further verified by PCR genotyping using primers YJ10503, YJ10504, and  
138 YJ10686 (wild type 562 bp, insertion 744 bp). Single-copy insertion transgene *nuTi144* was  
139 generated by using a modified Mos1 transposon, following a previously published protocol  
140 (Frøkjær-Jensen et al., 2014).

#### 141 **CRISPR-Cas9 gene editing**

142 We generated the *jph-1(ju1683)* and *jph-1(ju1684)* deletion alleles using two CRISPR RNAs  
143 (crRNAs): 5'-CCGTCCGGTAACACCTATCA-3' and 5'-ACGACGTTGACCAGCAAGAC-3' (Integrated  
144 DNA Technologies) targeting *jph-1* exon 1 and exon 9, respectively. The crRNAs were injected  
145 into wild-type hermaphrodites with purified Cas9 (MacroLabs, University of California,  
146 Berkeley), trans-activating crRNA (tracrRNA) and *dpy-10* crRNA, as described (Paix et al., 2015).  
147 We selected small and slow-growing Unc animals resembling *jph-1(ok2823)* mutants, as we  
148 were unable to isolate animals based on Dpy or Rol phenotypes, possibly because the *jph-1*  
149 crRNA was more efficient than the *dpy-10* crRNA. We identified *ju1683* and *ju1684* as deletions  
150 in *jph-1* by PCR genotyping with flanking primers YJ12565 5'-GACGACGGCGGAACCTATG-3' and  
151 YJ12566 5'-TCAGGTACGTTCTAGTCGGT-3'.

152 GFP11 knock-in alleles *unc-68(nu664)* and *egl-19(nu674)* were generated by injecting wild-type  
153 hermaphrodites with 75 ng/μl pDD162 expressing Cas9, 36 ng/μl pRB1017-derived guide RNA,  
154 and 75ng/ul of a PCR product of 7 copies of GFP11 flanked by 1 kb of wild-type sequence 5' and  
155 3' of the cut site. Guide RNAs were selected using the CRISPR guide RNA selection tool  
156 (<http://genome.sfu.ca/crispr/>). A gRNA targeting *unc-58* (pGW28) 36 ng/μl and repair oligo (AF-  
157 JA-76) were also injected as a co-conversion marker (El Mouridi et al., 2017).

158

159

160 **Animal growth assessment**

161 Adult hermaphrodite animals were placed on seeded NGM plates and allowed to lay eggs for  
162 two hours, after which they were removed. The plates were kept at 20°C and observed daily to  
163 determine the time it took the offspring to reach the fourth larval (L4) stage.

164 **Brood size assay**

165 L4 hermaphrodite animals were individually placed on seeded NGM plates and moved to new  
166 plates daily. Two days after a parent animal was placed on a plate, the number of hatched  
167 offspring were counted. This was continued until parent animals laid no more eggs or died. The  
168 number of hatched offspring produced per parent animal was totaled to calculate brood size.

169 **Fluorescence microscopy**

170 Animals were immobilized in a drop of M9 solution with or without 30 mM muscimol or 10 mM  
171 levamisole on a 4% agar pad or 10% agarose pad. Most confocal fluorescence images were  
172 collected using a Zeiss LSM800 confocal microscope with Z-stacks taken at 0.5 or 1 µm intervals  
173 between planes for most images, with the exception of 0.21 µm intervals for GFP::*JPH-1A* in  
174 *unc-68(0)* (**Figure 7A,B**). *Pjph-1*-GFP in the head and tail (**Supplemental Figure 2A**) were imaged  
175 using a Zeiss LSM710 confocal microscope, and GFP::*JPH-1A* in the PLM neuron (**Supplemental**  
176 **Figure 4B**) was imaged using an Andor spinning disk confocal unit (CSU-W1) with a Leica DMI8  
177 microscope. All confocal fluorescence images were taken at 63x magnification. Maximum  
178 intensity projections were prepared using Fiji (ImageJ).

179 Images of GFP-labeled touch neurons [*Pmec-7*-GFP(*muls32*)] in wild-type and *jph-1(0)* animals  
180 were taken on a Zeiss Axio Imager A2 compound scope at 10x magnification under identical  
181 settings.

182 **Brightfield microscopy**

183 Images depicting gross body morphology (**Figure 1C**) were taken by immobilizing animals in a  
184 drop of M9 solution on a 10% agarose pad and imaging on a Leica DMI8 microscope under  
185 brightfield settings at 10x magnification with an Andor iXon Ultra camera. Images depicting

186 animal movement crawling on NGM petri plates (**Figure 4A**) were taken on a Zeiss M2  
187 stereodissecting microscope with a Nikon DS-Qi1Mc camera.

### 188 **Pharyngeal pumping assays**

189 To count pumping rate, day-1 adult animals on seeded plates were observed through dissection  
190 stereomicroscopes. We counted the number of grinder movements in 20 seconds twice per  
191 animal and took the average. Counting was done while animals were on the OP50 bacterial  
192 lawn to prevent variations in pumping rate caused by food availability.

193 To measure pumping strength, we adapted a published protocol that used serotonin to  
194 stimulate pumping in immobilized animals (Trojanowski and Fang-Yen, 2015). We prepared 8%  
195 agarose pads with 8mM serotonin (H7752, Sigma Aldrich), placed animals in an M9 drop on the  
196 pad, and immediately placed a cover slip on top. We began imaging when animals started  
197 pumping (about 0-10 minutes after animals were placed in the M9 drop). Imaging was  
198 performed on a Leica DMI8 microscope at 40x magnification. 20 second videos were taken at  
199 100 ms/frame for a total of 200 frames per animal. Videos were then analyzed in Fiji (ImageJ).  
200 The distance from the grinder to an arbitrary point on the pharyngeal lumen was measured in  
201 the frame immediately preceding pump initiation (**Figure 3B, left image**). The distance from the  
202 grinder to the same point was measured in the frame when the grinder had moved to its fullest  
203 extent (**Figure 3B, right image**). The difference between these two measurements is the  
204 distance moved by the grinder in one pump. We took the average of the first five pumps in  
205 each video, although in three instances wild-type animals only pumped three or four times  
206 during the video. The distance moved by the grinder was divided by the length of the pharynx  
207 (**Figure 3B, left image**) to normalize to animal size.

### 208 **Thrashing assay**

209 Individual L4 animals were placed in 1  $\mu$ l drops of M9 on a glass dissection plate. We counted  
210 the number of thrashes performed by the animal in one minute. We considered a single thrash  
211 to be one sufficiently large movement of the animal's head or tail back and forth, with the head  
212 or tail not necessarily crossing the centre of mass.



### 213 **Aldicarb and levamisole assays**

214 To test aldicarb sensitivity, 15 day-1 adult animals were transferred to fresh plates containing  
215 0.5 mM or 1 mM aldicarb. Animals were scored for paralysis every 30 minutes by gently  
216 touching the animal with a platinum wire. For levamisole sensitivity, 15 day-1 adult animals  
217 were transferred to fresh plates containing 1 mM levamisole. Animals were scored for paralysis  
218 every 15 minutes by gently touching the animal with a platinum wire. Final sample size for each  
219 assay was 13-15 animals due to some animals crawling off the plate. Drug sensitivity was  
220 quantified from three independent experiments.

### 221 **Laser axotomy of PLM axons**

222 We cut PLM axons and quantified the length of regrown axons as previously described (Wu et  
223 al., 2007). Briefly, GFP-labeled PLM axons [*Pmec-7-GFP(muls32)*] of L4 animals were cut 40  $\mu$ m  
224 anterior to the cell body by a femtosecond laser on a spinning-disk confocal microscope.  
225 Animals were recovered onto seeded NGM plates and the regrown axon was imaged 24 hours  
226 later on a Zeiss LSM510 or LSM800 confocal microscope.

### 227 **Statistical analysis**

228 We used Prism (GraphPad Software) for all statistical analysis except for Fisher's exact test, for  
229 which we used the online tool QuickCalcs (Graphpad Software). To compare regrowth between  
230 experiments with different control means, we normalized each experimental data point by  
231 dividing it by its control means. Statistical tests and sample sizes are indicated in Figures or  
232 Figure legends.

233 **Strains used in this manuscript:**

| Strain  | Genotype                                                                                                                       |
|---------|--------------------------------------------------------------------------------------------------------------------------------|
| N2      | wild type                                                                                                                      |
| CZ27358 | <i>jph-1(ju1683) I</i>                                                                                                         |
| CZ27360 | <i>jph-1(ju1684) I</i>                                                                                                         |
| CZ28073 | <i>jph-1(ju1683) I; juEx3390[jph-1 fosmid WRM0622aB02]</i>                                                                     |
| CZ28260 | <i>jph-1(ju1683) I; juEx3392[jph-1 fosmid WRM0623aF07]</i>                                                                     |
| CZ27162 | <i>juEx8014[Pjph-1-GFP]</i>                                                                                                    |
| CZ27161 | <i>juEx8013[Pjph-1-GFP]</i>                                                                                                    |
| CZ28024 | <i>jph-1(ju1683) I; juEx7999[Pjph-1-GFP::JPH-1A]</i>                                                                           |
| CZ27777 | <i>jph-1(ju1683) I; juSi387[Pjph-1-GFP::JPH-1A] IV</i>                                                                         |
| CZ27603 | <i>jph-1(ju1683) I; juEx8037[Pjph-1-GFP::JPH-1B]</i>                                                                           |
| CZ27606 | <i>jph-1(ju1683) I; juEx8038[Pjph-1-GFP::JPH-1B]</i>                                                                           |
| CZ27364 | <i>juSi387[Pjph-1-GFP::JPH-1A] IV</i>                                                                                          |
| CZ28264 | <i>nuTi144 [Pmyo-3 GFP 1-10 G418] I; unc-68(nu664) V; juEx8103[Pjph-1-mKate2::JPH-1A]</i>                                      |
| CZ28263 | <i>nuTi144 [Pmyo-3 GFP 1-10 G418] I; egl-19(nu674) IV; juEx8103[Pjph-1-mKate2::JPH-1A]</i>                                     |
| CZ27404 | <i>juSi387[Pjph-1-GFP::JPH-1A] IV; juls540[Pmec-4-mKate2::ESYT-2] X</i>                                                        |
| CZ27569 | <i>juEx8038[Pjph-1-GFP::JPH-1B]</i>                                                                                            |
| CZ24806 | <i>eat-4(ky5)</i>                                                                                                              |
| CZ27782 | <i>jph-1(ju1683) I; juEx8041[Pmyo-2-GFP::JPH-1A]</i>                                                                           |
| CZ28120 | <i>jph-1(ju1683) I; juEx8022[Pmyo-3-GFP::JPH-1A]</i>                                                                           |
| CZ28121 | <i>jph-1(ju1683) I; juEx8023[Pmyo-3-GFP::JPH-1A]</i>                                                                           |
| CZ28051 | <i>jph-1(ju1683) I; juSi389(Prab-3-GFP::JPH-1A] IV</i>                                                                         |
| CZ13170 | <i>jph-1(ok2823) I</i>                                                                                                         |
| CZ13990 | <i>jph-1(ok2823) I; juEx3390[jph-1 fosmid WRM0622aB02]</i>                                                                     |
| CZ27483 | <i>jph-1(ok2823) I; juEx3392[jph-1 fosmid WRM0623aF07]</i>                                                                     |
| CZ10969 | <i>muls32(Pmec-7-GFP) II</i>                                                                                                   |
| CZ26391 | <i>jph-1(ok2823) I; muls32[Pmec-7-GFP] II</i>                                                                                  |
| CZ27359 | <i>jph-1(ju1683) I; muls32[Pmec-7-GFP] II</i>                                                                                  |
| CZ27778 | <i>jph-1(ju1683) I; muls32[Pmec-7-GFP] II; juSi387[Pjph-1-GFP::JPH-1A]IV</i>                                                   |
| CZ27783 | <i>jph-1(ju1683) I; muls32[Pmec-7-GFP] II; juEx8041[Pmyo-2-GFP::JPH-1A]</i>                                                    |
| CZ27910 | <i>jph-1(ju1683) I; muls32[Pmec-7-GFP] II; juSi388[Pmec-4-GFP::JPH-1A]IV</i>                                                   |
| OD2984  | <i>ltSi953[Pmec-18-Degron-SL2-mKate2; cb-unc-119(+)]II; unc-119(ed3)III</i>                                                    |
| CZ27842 | <i>jph-1(ju1683) I; ltSi953[Pmec-18-Degron-SL2-mKate2; cb-unc-119(+)] II; juSi387[Pjph-1-GFP::JPH-1A] IV; unc-119(ed3)?III</i> |
| CZ27361 | <i>jph-1(ju1684) I; muls32[Pmec-7-GFP] II</i>                                                                                  |
| CZ27536 | <i>juEx8035[Pjph-1-GFP::JPH-1(ok2823)]</i>                                                                                     |
| CZ28262 | <i>nuls321[Punc-17-mCherry]; juEx7999[Pjph-1-GFP::JPH-1A]</i>                                                                  |
| CZ27875 | <i>juSi388[Pmec-4-GFP::JPH-1A] IV</i>                                                                                          |

|         |                                                                     |
|---------|---------------------------------------------------------------------|
| CZ26322 | <i>esyt-2(ju1409) III</i>                                           |
| CZ28238 | <i>esyt-2(ju1409) III; juEx7581 [esyt-2 gDNA]</i>                   |
| CZ28070 | <i>jph-1(ju1683) I; esyt-2(ju1409) III</i>                          |
| CZ26389 | <i>esyt-2(ju1408) III</i>                                           |
| CZ28241 | <i>jph-1(ju1684) I; esyt-2(ju1408) III</i>                          |
| CZ28282 | <i>jph-1(ju1683) I; esyt-2(ju1409) III; juEx7581 [esyt-2 gDNA]</i>  |
| CB540   | <i>unc-68(e540) V</i>                                               |
| CZ28026 | <i>jph-1(ju1683) I; unc-68(e540)V; juEx7999[Pjph-1-GFP::JPH-1A]</i> |
| CZ26691 | <i>egl-19(ad1006lf) IV</i>                                          |
| DA695   | <i>egl-19(ad695gf) IV</i>                                           |
| CZ27905 | <i>jph-1(ju1683) I; egl-19(ad695gf) IV</i>                          |
| CB55    | <i>unc-2(e55) X</i>                                                 |
| CZ28054 | <i>jph-1(ju1683) I; unc-2(e55) X; juEx7999[Pjph-1-GFP::JPH-1A]</i>  |
| QW47    | <i>unc-2(zf35gf) X</i>                                              |
| CZ27903 | <i>jph-1(ju1683) I; unc-2(zf35gf) X</i>                             |
| CZ28025 | <i>unc-68(e540) V; juEx7999[Pjph-1-GFP::JPH-1A]</i>                 |
| CZ28053 | <i>unc-2(e55) X; juEx7999[Pjph-1-GFP::JPH-1A]</i>                   |
| CZ28055 | <i>esyt-2(ju1409) III; juSi387[Pjph-1-GFP::JPH-1A] IV</i>           |

235 **Plasmid used in this manuscript:**

| Plasmid name | Description                                                                             |
|--------------|-----------------------------------------------------------------------------------------|
| pCZGY3516    | <i>Pjph-1</i> -GFP:: <i>JPH-1A</i>                                                      |
| pCZGY3519    | <i>Pjph-1</i> -GFP:: <i>JPH-1A</i> with homology arms for CRISPR/Cas9 knock-in          |
| pCZGY3525    | <i>Pjph-1</i> -GFP:: <i>JPH-1B</i>                                                      |
| pCZGY3344    | <i>Pmec-4</i> -mKate2:: <i>ESYT-2</i>                                                   |
| pCZGY3518    | <i>Pjph-1</i> -GFP                                                                      |
| pCZGY3523    | <i>Pmyo-2</i> -GFP:: <i>JPH-1A</i>                                                      |
| pCZGY3522    | <i>Prab-3</i> -GFP:: <i>JPH-1A</i> with homology arms for CRISPR/Cas9 knock-in          |
| pCZGY3535    | <i>Pmyo-3</i> -GFP:: <i>JPH-1A</i>                                                      |
| pCZGY3520    | <i>Pmec-4</i> -GFP:: <i>JPH-1A</i> with homology arms for CRISPR/Cas9 knock-in          |
| pCZGY2750    | <i>Peft-3</i> :Cas9 + cxTi10882 sgRNA                                                   |
| pCFJ90       | <i>Pmyo-2</i> -mCherry                                                                  |
| pCFJ104      | <i>Pmyo-3</i> -mCherry                                                                  |
| pCZGY3529    | <i>Pjph-1</i> -GFP:: <i>JPH-1(ok2823)</i>                                               |
| WRM0622aB02  | Fosmid containing <i>jph-1</i>                                                          |
| WRM0623aF07  | Fosmid containing <i>jph-1</i>                                                          |
| pKP3315      | <i>Pmyo-3</i> split GFP 1-10 miniMOS G418                                               |
| pKP3318      | <i>egl-19</i> exon 1 gRNA 5'-TTACCTGACATGATGGACAC-3'                                    |
| pKP3319      | <i>egl-19</i> exon 1 x7 GFP FP11 with with homology arms for CRISPR/Cas9 knock-in       |
| pKP3320      | <i>unc-68A</i> exon 31 gRNA 5'-GATGCTGCAGCCACGGCGG-3'                                   |
| pKP3321      | <i>unc-68A</i> exon 31 x7 GFP FP11 with 1kb with homology arms for CRISPR/Cas9 knock-in |
| pGW28        | <i>unc-58</i> gRNA co-CRISPR 5'-ATCCACGCACATGGTCACTA-3'                                 |
| pDD162       | <i>Peft-3</i> -CAS9 (Goldstein Lab)                                                     |

236

237 **Transgenes used in this manuscript:**

| Transgene name                             | Injected DNA       | Injected conc. (ng/ $\mu$ L) | Coinjection marker and conc.          | Source                    |
|--------------------------------------------|--------------------|------------------------------|---------------------------------------|---------------------------|
| <i>juEx3390[jph-1 fosmid WRM0622aB02]</i>  | fosmid WRM0622aB02 | 10                           | <i>Pttx-3</i> -RFP (30 ng/ $\mu$ L)   | This manuscript           |
| <i>juEx3392[jph-1 fosmid WRM0623aF07]</i>  | fosmid WRM0623aF07 | 10                           | <i>Pttx-3</i> -RFP (30 ng/ $\mu$ L)   | This manuscript           |
| <i>juEx8014[Pjph-1-GFP]</i>                | pCZGY3518          | 2.5                          | <i>Punc-122</i> -RFP (50 ng/ $\mu$ L) | This manuscript           |
| <i>juEx8013[Pjph-1-GFP]</i>                | pCZGY3518          | 2.5                          | <i>Punc-122</i> -RFP (50 ng/ $\mu$ L) | This manuscript           |
| <i>juEx7999[Pjph-1-GFP::JPH-1A]</i>        | pCZGY3516          | 2.5                          | <i>Punc-122</i> -RFP (50 ng/ $\mu$ L) | This manuscript           |
| <i>juSi387[Pjph-1-GFP::JPH-1A]</i>         | pCZGY3519          | 2.5                          |                                       | This manuscript           |
| <i>juEx8037[Pjph-1-GFP::JPH-1B]</i>        | pCZGY3525          | 2.5                          | <i>Punc-122</i> -RFP (50 ng/ $\mu$ L) | This manuscript           |
| <i>juEx8038[Pjph-1-GFP::JPH-1B]</i>        | pCZGY3525          | 2.5                          | <i>Punc-122</i> -RFP (50 ng/ $\mu$ L) | This manuscript           |
| <i>juls540[Pmec-4-mKate2::ESYT-2]</i>      |                    |                              |                                       | Kim <i>et al.</i> , 2018  |
| <i>juEx8041[Pmyo-2-GFP::JPH-1A]</i>        | pCZGY3523          | 0.125                        | <i>Punc-122</i> -RFP (50 ng/ $\mu$ L) | This manuscript           |
| <i>juEx8022[Pmyo-3-GFP::JPH-1A]</i>        | pCZGY3535          | 2.5                          | <i>Punc-122</i> -RFP (50 ng/ $\mu$ L) | This manuscript           |
| <i>juEx8023[Pmyo-3-GFP::JPH-1A]</i>        | pCZGY3535          | 2.5                          | <i>Punc-122</i> -RFP (50 ng/ $\mu$ L) | This manuscript           |
| <i>juSi389[Prab-3-GFP::JPH-1A]</i>         | pCZGY3522          | 10                           |                                       | This manuscript           |
| <i>juSi388[Pmec-4-GFP::JPH-1A]</i>         | pCZGY3520          | 2.5                          |                                       | This manuscript           |
| <i>ItSi953[pOD2087/pSW408]</i>             |                    |                              |                                       | Wang <i>et al.</i> , 2017 |
| <i>juEx8035[Pjph-1-GFP::JPH-1(ok2823)]</i> | pCZGY3529          | 2.5                          | <i>Punc-122</i> -RFP (50 ng/ $\mu$ L) | This manuscript           |
| <i>nuTi144</i>                             | pKP3315            | 10                           |                                       | This manuscript           |

238

239 **Primers used in this manuscript:**

| <b>Cloning primers</b> |                                                                                                                |                                                                |
|------------------------|----------------------------------------------------------------------------------------------------------------|----------------------------------------------------------------|
| <b>Name</b>            | <b>Sequence</b>                                                                                                | <b>Purpose</b>                                                 |
| YJ12558                | gacgtaggtgtgtcagcag                                                                                            | 5' flanking primer to amplify <i>jph-1</i> cDNA                |
| YJ12559                | cctgaggagaagtgtgtctg                                                                                           | 3' flanking primer to amplify <i>jph-1</i> cDNA                |
| YJ12560                | atgaatggaggcagatttgac                                                                                          | Forward primer to amplify <i>jph-1</i> from start codon        |
| YJ12561                | ctacgaagaagacttcttcttcttc                                                                                      | Reverse primer to amplify <i>jph-1</i> isoform A to stop codon |
| YJ12562                | ctaataatgtgagggtgtgtaccg                                                                                       | Reverse primer to amplify <i>jph-1</i> isoform B to stop codon |
| YJ12563                | tgttctgccattaccagcccg                                                                                          | Forward primer to amplify 4.5 kb <i>jph-1</i> promoter         |
| YJ12564                | ttccatttgccgtactgtctg                                                                                          | Reverse primer to amplify 4.5 kb <i>jph-1</i> promoter         |
| AF-JA-76               | atTTTgtgtataaaatagccgagtaggaacaaa<br>TTTTtcttcaggTTTctcagtagtgaccatgtgcgtg<br>gatcttgcgtccacacatctcaaggcgtactt | <i>unc-58(gf)</i> coCRISPR repair oligo                        |

240

| <b>Genotyping primer sets</b> |                                                                                        |                                                                   |                                                                                    |
|-------------------------------|----------------------------------------------------------------------------------------|-------------------------------------------------------------------|------------------------------------------------------------------------------------|
| <b>Name</b>                   | <b>Sequence</b>                                                                        | <b>Purpose</b>                                                    | <b>Product size</b>                                                                |
| YJ12565<br>YJ12566<br>YJ12567 | gacgacggcggaacctatg<br>tcaggtacgttctagtcggt<br>gtcttgcgtggtcaacgtcgt                   | Genotype <i>jph-1(ju1683)</i><br>and <i>jph-1(ju1684)</i>         | WT 154 bp,<br><i>ju1683</i> 250 bp,<br><i>ju1683</i> 294 bp,<br>cDNA no<br>product |
| YJ10503<br>YJ10504<br>YJ10686 | ggaacaaaggagttcagatcctgtg<br>ggaagacccttagttcaaacaagtg<br>TTTTcagaaatatatgccgaggatgttc | Genotype all single copy<br>insertion ( <i>juSi</i> ) lines       | WT 562 bp,<br><i>juSi</i> 744 bp                                                   |
| YJ12568<br>YJ12569<br>YJ12570 | gtctacgatcaagtgttca<br>gaacaatagacaccgatgga<br>atcaacctggcacgataatt                    | Genotype <i>jph-1(ok2823)</i>                                     | WT 273 bp,<br><i>ok2823</i> 390<br>bp, cDNA 870<br>bp                              |
| YJ12571<br>YJ12572            | ggattccacgaactgttgatg<br>cttttcagcagcattcacc                                           | Amplify area flanking<br><i>unc-68(e540)</i> for<br>sequencing    | 453 bp                                                                             |
| YJ12573<br>YJ12574            | gtacttcgaactgatgcaatgctc<br>gtgaaatcatcgcatctccg                                       | Amplify area flanking<br><i>egl-19(ad695gf)</i> for<br>sequencing | 370 bp                                                                             |
| YJ12575<br>YJ12576            | gaatgatccaccacgggttg<br>catcagaatgagcgtgttcag                                          | Amplify area flanking<br><i>unc-2(zf35gf)</i> for<br>sequencing   | 478 bp                                                                             |

|                               |                                                                        |                                                             |                                                             |
|-------------------------------|------------------------------------------------------------------------|-------------------------------------------------------------|-------------------------------------------------------------|
| YJ12052<br>YJ12577<br>YJ12578 | taaagtaacagccgcgccaa<br>aatatgtgctagcaagtatttga<br>cttggcactgtgtccattg | Genotype <i>esyt-2(ju1408)</i><br>and <i>esyt-2(ju1409)</i> | WT 324 bp,<br><i>ju1408</i> 733 bp,<br><i>ju1409</i> 733 bp |
| YJ12582<br>YJ12583            | cgcgccccagtcgccacatggtgtgacg<br>gggtacggtattgcgaaagctggc               | Genotype <i>nuTi144</i>                                     | WT 612 bp,<br><i>nuSi144</i> no<br>product                  |
| YJ12582<br>YJ12584            | cgcgccccagtcgccacatggtgtgacg<br>agctagcgacggcaaatact                   | Genotype <i>nuTi144</i>                                     | WT no<br>product,<br><i>nuSi144</i> 500bp                   |
| YJ12585<br>YJ12586            | gatctactgtctttgtgctaaagctgtctgg<br>ccaaagtaaaggacctaaccgtaaaatcc       | Genotype <i>egl-19(nu674)</i>                               | WT 2297 bp,<br><i>nu674</i> 2723 bp                         |
| YJ12585<br>YJ12587            | gatctactgtctttgtgctaaagctgtctgg<br>cgctactgtgaagaacatgtgatcagc         | Genotype <i>egl-19(nu674)</i>                               | WT no<br>product,<br><i>nu674</i> 1185 bp                   |
| YJ12588<br>YJ12589            | cgtgaagagctgaactatgtg<br>cccaactggtagtaatctcttc                        | Genotype <i>unc-68(nu664)</i>                               | WT 549 bp,<br><i>nu664</i> 975 bp                           |

241

| crRNAs  |                                                |                            |
|---------|------------------------------------------------|----------------------------|
| Name    | Sequence                                       | Purpose                    |
| YJ12590 | 5'-rCrCrGrUrCrCrGrGrUrArArCrArCrCrUrArUrCrA-3' | Target <i>jph-1</i> exon 1 |
| YJ12591 | 5'-rArCrGrArCrGrUrUrGrArCrCrArGrCrArArGrArC-3' | Target <i>jph-1</i> exon 9 |

242

243 Strains and plasmids are available upon request. The authors affirm that all data necessary for  
244 confirming the conclusions of the article are present within the article, figures, and tables.

## 245 **Results**

### 246 ***jph-1* expresses two isoforms**

247 A previous study described a *jph-1* cDNA that encodes a 747 amino acid protein (Yoshida et al.,  
248 2001). In the process of obtaining *jph-1* cDNA for our own study, we obtained two cDNAs of 2.2  
249 kb and 2.4 kb in size, amplified using primers flanking the start and stop codons (**Figure 1A**). The  
250 2.2 kb cDNA matches the previously reported *jph-1* cDNA, which we designated isoform A  
251 (Yoshida et al., 2001). The 2.4 kb cDNA retains the intron between exon 7 and exon 8 and would  
252 encode a protein with the C-terminal 138 amino acids of the previously reported *jph-1* cDNA  
253 replaced by a different 35 amino acid sequence (**Figure 1B**). We designated this shorter protein  
254 isoform B. The C-terminal 35 amino acids do not contain a predicted transmembrane domain,  
255 nor conserved domains or low complexity regions. A BLASTp search of all published  
256 *Caenorhabditis* genomes found no significant hits for the 35 amino acid sequence, suggesting  
257 that it is not conserved. Furthermore, a BLASTn search showed that although the intron is  
258 conserved in 10 out of 26 published *Caenorhabditis* genomes (**Supplemental Figure 1A**), the  
259 translated sequences have low amino acid conservation and highly variable sequence length  
260 due to intronic stop codons (**Supplemental Figure 1B**). The absence of conserved motifs and  
261 the lack of conservation between species suggests that these 35 amino acids may not be  
262 important for the function of *jph-1*. JPH-1 isoform A shares between 39% and 42% overall  
263 sequence identity with human JPH1 through 4, with higher sequence homology in the MORN  
264 repeats, which target junctophilin to the PM (Takeshima et al., 2000).

265

### 266 ***jph-1* is required for normal development**

267 To define the function of *jph-1*, we generated two null (*0*) alleles, *ju1683* and *ju1684*, using  
268 CRISPR-Cas9 editing. Both alleles delete the entire coding sequence of both *jph-1* isoforms  
269 (**Figure 1A**). These two alleles show indistinguishable phenotypes in all analyses; therefore, we  
270 generally present the quantification data for *ju1683* (**Table 1**). By gross body morphology, *jph-*  
271 *1(0)* mutant animals are smaller and thinner than stage-matched wild-type animals (**Figure 1C**).  
272 *jph-1(0)* mutants develop more slowly compared to wild-type animals (**Table 1**). *jph-1(0)*



273 mutants have reduced fertility, with a brood size ( $52 \pm 25$ ,  $n = 12$ ) about 20% of that in wild-  
274 type animals ( $279 \pm 19$ ,  $n = 10$ ). Transgenic expression of a fosmid containing the entire *jph-1*  
275 locus rescued the developmental defects (**Table 1**). These observations indicate that *jph-1* is  
276 necessary for proper animal development.

277

### 278 ***jph-1* is expressed in muscles and neurons, and its function requires the transmembrane** 279 **domain**

280 A previously reported *jph-1* transcriptional reporter showed expression in most muscles and  
281 some neurons in the head (Yoshida et al., 2001). We made a similar transcriptional reporter  
282 using a 4.5 kb *jph-1* promoter to control GFP expression (**Supplemental Figure 2A**). We  
283 confirmed GFP expression in all hermaphrodite muscle types, including body wall, pharyngeal,  
284 vulval, uterine, stomatointestinal, anal sphincter and anal depressor muscles, with the  
285 exception of the contractile gonadal sheath (**Supplemental Figure 2A**). We also observed  
286 expression in many neurons from head to tail.

287 All developmental defects of *jph-1(0)* were rescued by expression of N-terminally GFP-  
288 tagged JPH-1A under the control of the 4.5 kb *jph-1* promoter (**Supplemental Figure 2B**) as  
289 either a multicopy extrachromosomal array or a single copy insertion line (**Table 1, Figure 1C**).  
290 This result indicates that GFP-tagged JPH-1A can perform the developmental functions of *jph-1*  
291 and that the 4.5 kb promoter provides sufficient tissue specificity for *jph-1* function. In contrast,  
292 transgenic expression of GFP::JPH-1B, the truncated isoform lacking the transmembrane  
293 domain, under the same promoter, did not show rescuing activity (**Supplemental Figure 2C,**  
294 **Table 1**). This analysis supports a conclusion that the transmembrane domain is necessary for  
295 the function of JPH-1.

296

### 297 **JPH-1A localizes to subcellular puncta and co-localizes with the ER-PM contact site protein** 298 **ESYT-2 in neurons**

299 We observed that the functional GFP-tagged JPH-1A showed a punctate subcellular pattern in

300 muscles and neurons. In body wall muscle, GFP::JPH-1A localizes to rows of puncta that follow  
301 the obliquely striated pattern of the muscle (**Figure 2A,B**). In the pharyngeal muscle, JPH-1A  
302 localizes to puncta radiating from the pharyngeal lumen and lining the pharynx periphery  
303 (**Figure 2A**). We observed broad expression in neurons in the head and tail, including the  
304 bundled neuronal processes of the nerve ring, the ventral cord neurons, and touch receptor  
305 neurons (**Figure 2A-E**). In neuronal cell bodies of the head ganglia (**Figure 2C**), tail ganglia  
306 (**Figure 2D**), and ventral nerve cord (**Figure 2E**), GFP::JPH-1A shows a reticulate localization  
307 pattern and forms bright puncta near the periphery of the cell body. This localization is  
308 observed in newly hatched L1 animals and adults, suggesting that the localization is established  
309 prior to hatching and maintained into adulthood (**Supplemental Figure 2B**).

310 Junctophilins generally function to couple calcium channels between the ER and PM,  
311 including ER-localized ryanodine receptors (RyRs) and PM-localized L-type calcium channels  
312 (Landstrom et al., 2014). In *C. elegans*, *unc-68* encodes the RyR and *egl-19* encodes the Cav1  
313 VGCC  $\alpha$ 1-subunit. We generated split-GFP knock-in lines for both *unc-68* and *egl-19* and  
314 visualized their subcellular localization by expressing muscle GFP1-10 and mKate2::JPH-1A  
315 expressed under the *jph-1* promoter. In the body wall muscle, both UNC-68 and EGL-19 localize  
316 to rows of puncta, which nearly completely overlap with JPH-1A puncta (**Figure 2F-K**). JPH-1A  
317 co-localization with both the ER-localized UNC-68 and PM-localized EGL-19 is consistent with  
318 targeting to ER-PM contact sites in muscle cells.

319 To determine if the neuronal puncta of JPH-1A represent MCSs, we analyzed animals co-  
320 expressing GFP::JPH-1A with a reporter line expressing mKate2::ESYT-2 in touch receptor  
321 neurons. E-Syt (extended-synaptotagmin) proteins are conserved tethering proteins at ER-PM  
322 contact sites (Giordano et al., 2013). We showed previously that *C. elegans* ESYT-2 is expressed  
323 broadly in neurons and co-localizes with an ER marker at the cell periphery (Kim et al., 2018). In  
324 the PLM soma, GFP::JPH-1A puncta co-localize with mKate2::ESYT-2 (**Figure 2L-P**), suggesting  
325 that JPH-1A clusters at ER-PM contact sites in neuronal cell bodies. We also examined GFP-  
326 tagged JPH-1B and observed a mostly diffuse localization in the muscles and neurons  
327 (**Supplemental Figure 2C**), consistent with the transmembrane domain being critical for JPH-1

328 subcellular localization. The lack of *jph-1(0)* rescuing activity by JPH-1B suggests that the  
329 transmembrane domain is important for its localization and function.

330

### 331 ***jph-1* regulates pharyngeal muscle contraction**

332 The gross phenotypes of *jph-1(0)* mutants broadly resemble those of mutants with feeding  
333 defects in that they are small, thin, pale, and take longer to reach adulthood than wild-type  
334 animals (Avery, 1993; Avery and Horvitz, 1989). Our observation that *jph-1* is expressed in the  
335 pharynx suggests that the *jph-1(0)* phenotype may be due to defects in feeding related  
336 function. *C. elegans* eat by drawing bacteria into their mouth using pharynx pumping and  
337 crushing the bacteria with their grinder (Avery and You, 2012). We measured pumping rate by  
338 counting grinder movements and found that *jph-1(0)* mutants had a lower pumping rate than  
339 wild-type animals (**Figure 3A**). Pharyngeal muscle contraction is regulated by glutamatergic  
340 transmission. Loss of function in *eat-4*, encoding the sole glutamate transporter, causes  
341 reduced pumping rate (Lee et al., 1999). We found that *jph-1(0)* mutants had a similar pumping  
342 rate to *eat-4(ky5)* mutants (**Figure 3A**). However, since *eat-4(ky5)* animals are not as small as  
343 *jph-1(0)* mutants (**Table 1**), reduced pumping rate alone cannot account for the starved  
344 appearance of *jph-1(0)* mutants. We next quantified pumping strength by measuring the  
345 distance moved by the grinder in one pump (**Figure 3B, Materials and Methods**). *jph-1(0)*  
346 mutants had significantly weaker pumping strength than either wild type or *eat-4* mutants  
347 (**Figure 3C**). To test if reduced pharynx muscle activity was causing the starved appearance of  
348 *jph-1(0)* mutants, we expressed JPH-1A specifically in the pharynx muscle using the *myo-2*  
349 promoter. Pharyngeal muscle expression of JPH-1A restored pumping strength to wild-type  
350 levels (**Figure 3C**). Importantly, it also rescued the small body size and delayed development of  
351 *jph-1(0)* mutants (**Table 1, Figure 1C**). These observations indicate that JPH-1A is required for  
352 proper pharyngeal muscle function which ultimately impacts gross organismal development.

### 353 ***jph-1* is required in the body wall muscle for locomotion**

354 On solid surfaces, wild-type *C. elegans* crawl by sinusoidal body undulations (**Figure 4A**). In  
355 contrast, *jph-1(0)* mutants adopt unusual extended or curled postures during locomotion, move

356 slowly, and are frequently immobile, consistent with previous observations of *jph-1* RNAi  
357 treated animals (Yoshida et al., 2001). When placed in liquid, *C. elegans* swim by moving their  
358 entire bodies side-to-side to produce alternating C-shaped conformations (Gjorgjieva et al.,  
359 2014), which can be quantitated by counting thrashing frequency. We observed that *jph-1(0)*  
360 mutants exhibit far fewer thrashes per minute than wild-type animals (**Figure 4B**). Furthermore,  
361 *jph-1(0)* mutants would often thrash only the heads without moving the tail. The failure of  
362 muscle contraction to propagate to the tail suggested that *jph-1* might be required for  
363 transmission of the signal for muscle contraction. A fosmid containing genomic *jph-1* fully  
364 rescued locomotion on both solid surfaces and in liquid (**Table 1, Figure 4B**). JPH-1A driven by  
365 the *jph-1* promoter rescued locomotion defects and thrashing frequency, although not as well  
366 as the fosmid transgene (**Figure 4B**). JPH-1B did not discernably improve movement on solid  
367 surfaces, supporting the importance of the transmembrane domain for JPH-1 function.  
368 Expression of JPH-1A in body wall muscle, but not pharyngeal muscle or neurons, restored full-  
369 body thrashing in liquid and sinusoidal movement on solid surfaces (**Figure 4B**). These data  
370 indicate that *jph-1* is required in the body wall muscle for animal movement and suggest that it  
371 may be involved in both muscle contraction and propagation of a signal for contraction  
372 between muscle cells.

373

#### 374 ***jph-1* promotes axon regeneration cell non-autonomously**

375 We previously characterized a different *jph-1* mutation, *jph-1(ok2823)*, for its role in axon  
376 regeneration. *jph-1(ok2823)* is a small deletion removing part of the fourth intron to the sixth  
377 exon (**Figure 1A**). By analyzing cDNA isolated from *jph-1(ok2823)* animals, we found that *jph-*  
378 *1(ok2823)* would generate a protein truncated after the seventh MORN repeat. The gross  
379 morphology and movement of *jph-1(ok2823)* animals are similar to *jph-1(0)*, and these defects  
380 are fully rescued by the *jph-1* fosmid transgene (**Table 1**). We had observed that PLM axons of  
381 *jph-1(ok2823)* animals display reduced axon regeneration and enhanced axon-axon fusion after  
382 laser-induced axon injury (Kim et al., 2018). We tested if PLM axon regeneration is similarly  
383 affected in *jph-1(0)* mutants. Like *jph-1(ok2823)* animals, touch receptor neurons of *jph-1(0)*

384 mutants have normal morphology (**Supplemental Figure 3A**), indicating that *jph-1* is not  
385 required for axon outgrowth during development. After laser injury, *jph-1(0)* mutants exhibited  
386 strongly reduced axon regeneration, significantly different from both wild type and *jph-*  
387 *1(ok2823)* (**Figure 5A,B**). Expression of JPH-1A under the *jph-1* promoter fully rescued the  
388 regeneration defect, indicating that *jph-1* is required for axon regrowth after injury. Expression  
389 of JPH-1A in pharyngeal muscle, which rescued the growth and size of the animal (**Table 1**), also  
390 rescued axon regrowth (**Figure 5B**), suggesting that nutrient intake may influence axon  
391 regeneration. While *jph-1* is expressed in PLM neurons (**Figure 2**), expression of JPH-1A  
392 specifically in touch neurons did not rescue axon regrowth (**Figure 5B**). Furthermore, knocking  
393 down GFP:JPH-1A specifically in touch neurons of *jph-1(0)* animals through Degron-mediated  
394 degradation of GFP-JPH-1 (Wang et al., 2017) did not reduce axon regeneration (**Supplemental**  
395 **Figure 3B**). Together, these data indicate that *jph-1* regulates axon regeneration cell non-  
396 autonomously.

397 While we were able to replicate the increased axon fusion of *jph-1(ok2823)* mutants, we  
398 did not observe an increase in axon fusion in injured PLM axons in *jph-1(0)* mutants  
399 (**Supplemental Figure 3C**). We considered if the enhanced axon fusion observed in *jph-*  
400 *1(ok2823)* animals might be caused by the production of an abnormal protein. To test this, we  
401 made a construct fusing GFP to *jph-1* cDNA isolated from *jph-1(ok2823)* animals, named  
402 GFP::JPH-1(ok2823). In contrast to the subcellular punctate pattern of full-length JPH-1A,  
403 GFP::JPH-1(ok2823) was found in the nucleus of many neurons and body wall muscles  
404 (**Supplemental Figure 3D**). Therefore, two explanations can be made for the increased axon  
405 fusion of *jph-1(ok2823)* mutants: either that *jph-1(ok2823)* is a partial loss of function and that  
406 fusion is more likely when axon regrowth is only mildly impaired, or that *jph-1(ok2823)*  
407 produces a protein with altered activity that enhances axon fusion.

408

#### 409 ***jph-1* contributes to neuromuscular synaptic transmission**

410 Junctophilins are required for proper regulation of cytosolic calcium levels in cell types such as  
411 mouse cardiomyocytes, HL-1 immortalized mouse cardiomyocytes, and C2C12 myotubes (Chen

412 et al., 2013; Landstrom et al., 2011; Nakada et al., 2018; Reynolds et al., 2013; Takeshima et al.,  
413 2000; Van Oort et al., 2011). We observed broad expression of *jph-1* in neurons. Within the  
414 ventral nerve cord, we found that cholinergic motor neurons express *jph-1* (**Supplemental**  
415 **Figure 4A**). JPH-1A is present at the presynaptic terminal of touch receptor neurons  
416 (**Supplemental Figure 4B**). To examine if *jph-1* plays a role in synaptic transmission, we focused  
417 our study on the neuromuscular junction, where pharmacological assays can assess  
418 neuromuscular transmission. Release of acetylcholine from ventral cord motor neurons  
419 stimulates body wall muscle contraction in *C. elegans* (Von Stetina et al., 2006). Two  
420 pharmacological responses are widely used to assess neuromuscular transmission. Levamisole  
421 is an agonist of acetylcholine receptors expressed on the body wall muscle (Lewis et al., 1980).  
422 Upon exposure to 1 mM levamisole, *jph-1(0)* mutants paralyzed at the same rate as wild-type  
423 animals (**Supplemental Figure 5A**), suggesting that *jph-1* is not required for muscle responses to  
424 acetylcholine. The acetylcholinesterase inhibitor aldicarb causes the accumulation of  
425 acetylcholine at the neuromuscular junction, which leads to muscle hypercontraction and  
426 paralysis (Miller et al., 1996). Nearly all wild-type animals were paralyzed after 2 hours of  
427 exposure to 1 mM aldicarb (**Figure 6A**). In contrast, 70-80% of *jph-1(0)* mutants were still  
428 moving, suggesting that these animals may have decreased acetylcholine release. Aldicarb  
429 resistance was confirmed using a second *jph-1(0)* allele (**Supplemental Figure 5B**) and  
430 expression of a fosmid containing *jph-1* genomic DNA rescued the aldicarb resistance of *jph-*  
431 *1(0)* mutants (**Figure 6A**). Altogether, these results indicate that *jph-1* contributes to  
432 neuromuscular synaptic transmission.

433 As we had observed co-localization between JPH-1 and ESYT-2 in neurons, we tested the  
434 response of *esyt-2(0)* mutants to aldicarb. We found that *esyt-2(0)* mutants are aldicarb  
435 resistant, suggesting that they are also involved in neuromuscular synaptic transmission (**Figure**  
436 **6B**). A transgene containing the whole *esyt-2* genomic locus rescued the aldicarb resistance of  
437 *esyt-2(0)* (**Figure 6B**). Remarkably, the *jph-1(0);esyt-2(0)* double mutant paralyzed at a similar  
438 rate to wild-type – in effect, the *jph-1(0)* and *esyt-2(0)* mutations cancel each other out (**Figure**  
439 **6C**). We tested second alleles of *jph-1(0)* and *esyt-2(0)* and observed the same result  
440 (**Supplemental Figure 5C**). A transgene containing the *esyt-2* genomic locus in the *jph-1(0);esyt-*

441 *2(0)* double mutant restored aldicarb resistance, indicating that the wild-type aldicarb response  
442 is due to loss of *esyt-2* (**Figure 6D**). While *esyt-2(0)* animals are superficially wild-type, *jph-*  
443 *1(0);esyt-2(0)* mutants resemble *jph-1(0)* in growth and locomotion, suggesting that the *esyt-2*  
444 mutation does not compensate for the loss of *jph-1* in muscles. Taken together, these results  
445 suggest that while loss of *jph-1* or *esyt-2* alone disrupts neurotransmission, loss of both restores  
446 neurotransmission to wild-type levels.

447 *esyt-2(0)* mutants displayed a slight resistance to levamisole that was not observed in  
448 *jph-1(0)* or *jph-1(0);esyt-2(0)* mutants (**Supplemental Figure 5D**). A non-wild type response to  
449 levamisole typically suggests a role in the muscle response to acetylcholine. However, as we  
450 had previously shown that a *esyt-2* promoter::GFP transgene is expressed exclusively in the  
451 nervous system (Kim et al., 2018), this hints that the role of *esyt-2* in neurotransmission may be  
452 more complex.

453

#### 454 ***jph-1* promotes animal health and development in parallel with *unc-68/RyR* and voltage-** 455 **gated calcium channels**

456 Our observation that JPH-1A co-localizes with UNC-68/RyR and the VGCC  $\alpha$ 1-subunit EGL-19  
457 raises the possibility of direct interaction between them. We thus next investigated genetic  
458 interactions between *jph-1* and calcium channels in *C. elegans*.

459 Like *jph-1(0)* mutants, *unc-68(e540)* null mutants are small, slow growing, and show  
460 incomplete flaccid paralysis (Maryon et al., 1996). However, *unc-68(0)* mutants have darker  
461 pigmentation and grow more quickly than *jph-1(0)* mutants (**Table 2**), suggesting that they have  
462 less severe defects in nutrient intake (Avery, 1993). We found that *jph-1(0); unc-68(0)* double  
463 mutants grew even slower than either *jph-1(0)* or *unc-68(0)* single mutants (**Table 2**).

464 Expressing JPH-1A under the *jph-1* promoter in *jph-1(0); unc-68(0)* double mutants partially  
465 restored animal growth to more closely resemble *unc-68(0)* single mutants. The exacerbated  
466 slow growth of the *jph-1(0); unc-68(0)* double mutant indicates that *jph-1* has functions  
467 independent of *unc-68* and suggests that *jph-1* may couple other ER and PM components.

468 *egl-19* is expressed in both muscles and neurons, and *egl-19* null mutants are embryonic  
469 lethal (Lee et al., 1997). We therefore used a partial loss-of-function mutation, *egl-*  
470 *19(ad1006lf)*, to test genetic interactions with *jph-1*. Animals homozygous for the *egl-*  
471 *19(ad1006lf)* mutation are long, thin, and flaccid, move slowly, and display weak pumping (Lee  
472 et al., 1997). We were unable to obtain viable *jph-1(0); egl-19(lf)* double mutants, suggesting  
473 that *jph-1* becomes crucial when *egl-19* function is impaired. We also constructed double  
474 mutants of *jph-1(0)* with the gain-of-function mutation *egl-19(ad695gf)*. Animals with *egl-*  
475 *19(ad695gf)* are short due to body wall muscle hypercontraction (Lainé et al., 2014) but  
476 otherwise appear normal in overall growth rate and movement. We found that *jph-1(0); egl-*  
477 *19(gf)* animals lived to adulthood, but grew more slowly than *jph-1(0)* single mutants (**Table 2**).  
478 Overall, these observations suggest that when *egl-19* activity is impaired or altered, *jph-1*  
479 activity becomes more important.

480 The non-L-type VGCC  $\alpha$ 1-subunit *unc-2*, orthologous to CACNA1A, is predominantly  
481 expressed in neurons and localizes to presynaptic terminals (Mathews et al., 2003; Saheki and  
482 Bargmann, 2009). *unc-2(e55)* null mutants exhibit sluggish movement but normal development  
483 and growth (Mathews et al., 2003; Schafer et al., 1996). We found that *jph-1(0); unc-2(0)*  
484 double mutants grew substantially more slowly than *jph-1(0)* single mutants and were sterile as  
485 adults (**Table 2**). The *unc-2(zf35gf)* gain-of-function mutation causes the channel to open at a  
486 lower membrane potential, causing hyperactive locomotion but otherwise normal growth and  
487 development (Huang et al., 2019). *jph-1(0); unc-2(gf)* double mutants displayed significantly  
488 slower growth than *jph-1* single mutants (**Table 2**). These results suggest that *jph-1* and *unc-2*  
489 function cooperatively in neurons.

490 Altogether, our analysis of genetic interactions supports a conclusion that *jph-1* acts  
491 together with RyR and VGCC channels for animal development, where they are not in  
492 completely overlapping pathways but may have some overlapping roles.

493

#### 494 **JPH-1A subcellular localization depends on *unc-68/RyR***

495 Evidence from other cell types suggest that junctophilins and their interacting partners may



496 depend on each other to be localized to MCS (Golini et al., 2011; Nakada et al., 2018). We thus  
497 tested if JPH-1A localization depends on calcium channels and *esyt-2*. In the body wall muscle of  
498 wild type animals, JPH-1A localizes to longitudinal rows of puncta (**Figure 7A**). In *unc-68*  
499 mutants, JPH-1A puncta were less distinct and often connected to neighbouring puncta. (**Figure**  
500 **7A**). In wild-type neurons, JPH-1A has a reticulate pattern with bright puncta in the cell  
501 periphery (**Figure 7B**). In *unc-68* mutants, while the reticulate pattern of JPH-1 remained, the  
502 bright puncta were absent (**Figure 7B**). The lack of puncta in both muscles and neurons of *unc-*  
503 *68* animals suggests that *unc-68* is required for anchoring JPH-1A in puncta. JPH-1A localization  
504 was unchanged from wild type in *unc-2* and *esyt-2* mutants (**Figure 7, Supplemental Figure 6A-**  
505 **B**), indicating that these genes are not required for JPH-1A localization.

506

## 507 Discussion

508 Junctophilins play key roles in excitation-contraction coupling in heart and skeletal muscles (Ito  
509 et al., 2001; Nakada et al., 2018; Takeshima et al., 2000; Van Oort et al., 2011). In particular,  
510 junctophilins couple PM- and ER-localized calcium channels to efficiently trigger calcium release  
511 from the ER following membrane depolarization (Chen et al., 2013; Nakada et al., 2018;  
512 Reynolds et al., 2013; Van Oort et al., 2011). Here, we report that the *C. elegans* junctophilin  
513 JPH-1 is expressed in pharyngeal muscle, body wall muscle, and neurons, and performs  
514 important functions in each tissue. We show that in the pharyngeal muscle, *jph-1* is required for  
515 robust pumping and timely growth and development. The stunted development of *jph-1(0)*  
516 mutants is likely due to reduced food intake caused by weak pumping, as their slow growth and  
517 starved appearance is seen in other mutants with defects in feeding related function (Avery,  
518 1993; Avery and Horvitz, 1989). In the body wall muscle, we find that *jph-1* is required for body  
519 movement and locomotion. *jph-1(0)* mutants move slowly and display flaccid paralysis,  
520 suggesting that the body wall muscle lacks contraction strength. Our tissue-specific rescue  
521 experiments indicate that muscle contraction in both pharyngeal and body wall muscle requires  
522 *jph-1*. In flies, knockdown or overexpression of the sole junctophilin was shown to cause  
523 muscular deficits and cardiac dysfunction (Calpena et al., 2018). Skeletal muscle from neonatal

524 JPH-1 knockout mice have weaker electrically-stimulated contractile force, indicating that JPH-1  
525 is required for excitation-contraction coupling (Ito et al., 2001). Thus, the role for junctophilin in  
526 muscle contraction is conserved from *C. elegans* pharyngeal and body wall muscle to  
527 vertebrates.

528         The role of calcium regulation in axon regeneration in *C. elegans* has been widely  
529 demonstrated (Ghosh-Roy et al., 2010). *unc-68/RyR* promotes axon regeneration, and is  
530 required for localized calcium release from the ER following axon injury (Sun et al., 2014). We  
531 previously reported that *jph-1(ok2823)* mutants have decreased axon regeneration (Kim et al.,  
532 2018). Here, we extended our analysis to the genetic null alleles of *jph-1* and uncovered a  
533 surprising role of *jph-1* in promoting axon regeneration in a cell non-autonomous manner. The  
534 observation that the regeneration defects could be rescued by expressing *jph-1* in the  
535 pharyngeal muscle implies that PLM axon regeneration may be influenced by nutrient uptake or  
536 through substances released by the pharynx. This finding raises an intriguing possibility that gut  
537 nutrients may impact neuronal injury response, a theme that shares similarities to emerging  
538 findings on the gut-brain axis in other axon regeneration studies (Kigerl et al., 2020).  
539 Additionally, despite *jph-1(ok2823)* animals resembling *jph-1(0)* in all gross phenotypes, our  
540 data suggest that the increased fusion in *jph-1(ok2823)* is likely due to an altered activity  
541 associated with the truncated protein JPH-1(ok2823) that localizes to the nucleus. Interestingly,  
542 a study in mouse found that heart stress induces cleavage of JPH-2, with the N-terminal JPH-2  
543 fragment translocating to the nucleus where it alters transcription (Guo et al., 2018). Therefore,  
544 it is conceivable that the mutant protein produced in *jph-1(ok2823)* alters neuronal  
545 transcription to enhance axon fusion after injury.

546         Our finding that *jph-1(0)* mutants are resistant to the acetylcholinesterase inhibitor  
547 aldicarb suggests that *jph-1* modulates neurotransmission at the neuromuscular junction. The  
548 fact that *jph-1(0)* mutants showed a normal response to the acetylcholine receptor agonist  
549 levamisole suggests that *jph-1* modulates neurotransmission by functioning in neurons. In JPH-  
550 3/4 double knockout mice, paired-pulse stimulation of climbing fibres elicits normal depression  
551 in Purkinje cells, but paired-pulse stimulation of parallel fibres elicits reduced facilitation in  
552 Purkinje cells, leading the authors of the study to conclude that JPH-3/4 may play a subtle role

553 in mammalian synaptic transmission (Kakizawa et al., 2007). Our work suggests that *jph-1* may  
554 have a role in synaptic transmission that has largely been overlooked in studies on neuronal  
555 junctophilins in mammals. In hippocampal neurons, junctophilins couple PM-localized CaV1.3  
556 VGCCs, ER-localized RyR2 Ca<sup>2+</sup>-gated Ca<sup>2+</sup> channels, and PM-localized KCa3.1 Ca<sup>2+</sup>-activated  
557 K<sup>+</sup> channels (Sahu et al., 2019). This coupling generates the slow afterhyperpolarization current,  
558 which regulates action potential frequency. Unlike mammalian neurons, which generate  
559 voltage-gated Na<sup>+</sup> channel-dependent action potentials, *C. elegans* neurons mostly rely on a  
560 calcium current for membrane depolarization (Goodman et al., 1998). Therefore, while  
561 junctophilins likely regulate calcium-induced calcium release in both *C. elegans* and mammalian  
562 neurons, the physiological consequences of losing junctophilin depend on neuronal properties.

563 Our data further uncovers intriguing genetic interactions between *jph-1* and *esyt-2* in  
564 synaptic transmission. Extended-synaptotagmin was shown to have a presynaptic role in  
565 neurotransmission in *Drosophila* (Kikuma et al., 2017). Consistently, we found that *esyt-2* null  
566 mutants were aldicarb resistant. Strikingly, we found that *jph-1(0); esyt-2(0)* double mutants  
567 had a wild-type response to aldicarb. This mutual suppression suggests that when either *jph-1*  
568 or *esyt-2* is mutated, neurotransmission is unbalanced; when the other is also mutated, the  
569 balance is restored. As we do not yet know whether *jph-1* and *esyt-2* function pre- or  
570 postsynaptically, the mechanism is unclear. However, as both proteins are ER-PM tethers, the  
571 mechanism likely involves ER calcium release. It would be of future interest to determine the  
572 exact nature of how *jph-1* regulates neurotransmission.

573 Finally, our genetic double mutant analysis sheds light on the importance of JPH-1  
574 mediated ER-PM calcium channel coupling. Many studies on junctophilins have focused on their  
575 roles in coupling the ER-localized RyR with PM-localized channels in muscles and neurons. In *C.*  
576 *elegans*, RyR is encoded by *unc-68*. Early studies showed using both *unc-68* promoter::GFP and  
577 anti-UNC-68 immunostaining that *unc-68* is expressed in muscles and neurons, but absent in  
578 the anterior pharynx (Maryon et al., 1998). *unc-68* null mutants are aldicarb resistant, and  
579 electrophysiological studies have shown that *unc-68* has a pre-synaptic role in synaptic  
580 transmission (Liu et al., 2005; Maryon et al., 1998). We observed *jph-1* expression in the entire  
581 pharynx. Close comparison of *jph-1* and *unc-68* null mutants showed that they have similar

582 movement and growth phenotypes, but *jph-1(0)* exhibited more severe growth retardation.  
583 Moreover, *jph-1(0); unc-68(0)* double mutants exhibit more severe growth defects than *unc-68*  
584 or *jph-1* single mutants. This analysis suggests that JPH-1 has additional RyR-independent roles.  
585 Possibilities include the generation of ER-PM contact sites, regulation of store-operated calcium  
586 entry (Hirata et al., 2006; Li et al., 2010), and coupling other ER components to the PM.  
587 Previous studies have shown that junctophilins are required for the co-localization of ER- and  
588 PM-localized calcium channels in isolated mouse cardiomyocytes, mouse skeletal muscle, and  
589 cultured hippocampal neurons (Nakada et al., 2018; Sahu et al., 2019; Van Oort et al., 2011). In  
590 rat cardiomyocytes, RyR localizes to muscle triads before JPH-2 arrives (Ziman et al., 2010),  
591 suggesting that the targeting of junctophilins by RyR may be conserved. Junctophilins and RyRs  
592 have been shown to directly interact (Beavers et al., 2013; Golini et al., 2011; Nakada et al.,  
593 2018; Phimister et al., 2007; Van Oort et al., 2011; Woo et al., 2008). We found that JPH-1  
594 localization depends on *unc-68/RyR*. It is possible that junctophilin targeting may involve  
595 directly binding to RyR already localized at MCSs.

596 In conclusion, our study shows that *C. elegans jph-1*, similar to vertebrate homologs, has  
597 broad functions in excitable cells. Our data uncover new roles of junctophilins in synaptic  
598 transmission and axon regeneration, and the requirement for RyR in junctophilin localization.  
599 The conservation in function between mammalian and *C. elegans* junctophilins presents the  
600 opportunity for *C. elegans* to be used for further investigations of junctophilins.

601

## 602 **Acknowledgements**

603 We thank our lab members for discussion and comments. This work was supported by grants  
604 from NIH (R01 NS093588 to ADC and YJ, R01 GM054657 (ADC), R01 NS32196 to JMK, and R37  
605 NS 035546 to YJ).

606 **Table 1. Summary of growth phenotypes of *jph-1* mutants and relevant transgenic animals**

| Genotype             | Transgene                                     | Days to L4 (20°C) | Body size at L4 |
|----------------------|-----------------------------------------------|-------------------|-----------------|
| wild type            | none                                          | 2                 | Normal          |
| <i>jph-1(ju1683)</i> | none                                          | 3 to 4            | Small           |
| <i>jph-1(ju1683)</i> | Fosmid with genomic <i>jph-1</i> <sup>1</sup> | 2                 | Normal          |
| <i>jph-1(ju1683)</i> | JPH-1A <sup>2</sup>                           | 2                 | Normal          |
| <i>jph-1(ju1683)</i> | JPH-1B <sup>3</sup>                           | 3 to 5            | Small           |
| <i>eat-4(ky5)</i>    | None                                          | 2                 | Normal          |
| <i>jph-1(ju1683)</i> | JPH-1A in pharyngeal muscle <sup>2</sup>      | 2                 | Normal          |
| <i>jph-1(ju1683)</i> | JPH-1A in body wall muscle <sup>2</sup>       | 3 to 4            | Small           |
| <i>jph-1(ju1683)</i> | JPH-1A in neurons <sup>2</sup>                | 3 to 4            | Small           |
| <i>jph-1(ok2823)</i> | None                                          | 3 to 4            | Small           |
| <i>jph-1(ok2823)</i> | Fosmid with genomic <i>jph-1</i> <sup>1</sup> | 2                 | Normal          |

607

608 <sup>1</sup> a fosmid containing the entire genomic locus of *jph-1* [WRM0622aB02(*juEx3390*) or

609 WRM0623aF07(*juEx3392*)]

610 <sup>2</sup> transgenic expression of JPH-1A under its own promoter [*Pjph-1-GFP::JPH-1A(juSi387* or

611 *juEx7999)*], in pharyngeal muscle [*Pmyo-2-GFP::JPH-1A(juEx8041)*], in body wall muscle [*Pmyo-*

612 *3-GFP::JPH-1A(juEx8022* or *juEx8023)*], in neurons [*Prab-3-GFP::JPH-1A(juSi389)*]

613 <sup>3</sup>JPH-1B [*Pjph-1-GFP::JPH-1B(juEx8037* or *juEx8038)*].

614 **Table 2. Summary of growth rates and movement of double mutants of *jph-1(0)* with calcium**  
 615 **channels and *esyt-2* mutants.**

| Genotype                                                              | Days to L4 (20°C) | Movement                  |
|-----------------------------------------------------------------------|-------------------|---------------------------|
| <i>jph-1(ju1683)</i>                                                  | 3 to 4            | Partial flaccid paralysis |
| <i>unc-68(e540)</i>                                                   | 2 to 3            | Partial flaccid paralysis |
| <i>egl-19(ad1006lf)</i>                                               | 2                 | Partial flaccid paralysis |
| <i>egl-19(ad695gf)</i>                                                | 2                 | Normal                    |
| <i>unc-2(e55)</i>                                                     | 2                 | Paralyzed                 |
| <i>unc-2(zf35gf)</i>                                                  | 2                 | Hyperactive               |
| <i>esyt-2(ju1409)</i>                                                 | 2                 | Normal                    |
| <i>jph-1(ju1683); unc-68(e540)</i>                                    | 4 to 6            | Severe flaccid paralysis  |
| <i>jph-1(ju1683); unc-68(e540);<br/>juEx7999 [Pjph-1-GFP::JPH-1A]</i> | 3 to 4            | Partial flaccid paralysis |
| <i>jph-1(ju1683); egl-19(ad1006lf)</i>                                | Lethal            |                           |
| <i>jph-1(ju1683); egl-19(ad695gf)</i>                                 | 4 to 5            | Partial flaccid paralysis |
| <i>jph-1(ju1683); unc-2(e55)</i>                                      | 4 to 7            | Paralyzed                 |
| <i>jph-1(ju1683); unc-2(zf35gf)</i>                                   | 5 to 7            | Partial flaccid paralysis |
| <i>jph-1(ju1683); esyt-2(ju1409)</i>                                  | 3 to 5            | Partial flaccid paralysis |

616

617 All alleles are null unless otherwise annotated as gain-of-function (gf) or partial loss-of-function  
 618 (lf).

619 **Figure legends**

620 **Figure 1. *jph-1* expresses two isoforms that differ at their C-termini and is required for animal**  
621 **development**

622 **A)** Illustration of *jph-1* spliced isoforms and deletion alleles. Exons are dark grey boxes, introns  
623 are black lines, and UTRs are light grey boxes. *ok2823* is a 637 bp deletion, *ju1683* is a 3891 bp  
624 deletion, and *ju1684* is a 3858 bp deletion with a 13 bp insertion.

625 **B)** Illustration of *C. elegans* JPH-1 proteins predicted from isolated cDNA sequences in  
626 comparison to human JPH proteins. Dark grey boxes indicate membrane occupation and  
627 recognition nexus (MORN) repeats and white boxes indicate transmembrane domains. The  
628 striped box at the C-terminus of JPH-1B indicates the 35 amino residues predicted from the  
629 cDNA. These 35 amino acids are not predicted to form a transmembrane region or low-  
630 complexity domain using Pfam (El-Gebali et al., 2019), the TMHMM Server v 2.0  
631 (<http://www.cbs.dtu.dk/services/TMHMM/>), or SMART (Letunic and Bork, 2018). A BLASTp search  
632 of these 35 amino acids against all published *Caenorhabditis* genomes (Caenorhabditis.org) also  
633 revealed no significant hits with a low e-value threshold of 1.0.

634 Gene accession numbers are: JPH-1A (NP\_492193.2), Human JPH1 (NP\_001304759.1), JPH2  
635 (NP\_065166.2), JPH3 (NP\_065706.2), and JPH4 (NP\_001139500.1). Pairwise sequence  
636 alignments were performed between *C. elegans* JPH-1A and human JPH1, JPH2, JPH3, and JPH4  
637 using MUSCLE (Madeira et al., 2019) and the Percent Identity Matrix was viewed to find percent  
638 identity. To determine conservation between MORN repeats, we concatenated all eight 14  
639 amino acid MORN repeats into one sequence for each protein and then performed pairwise  
640 sequence alignments using MUSCLE. Sequence identity ranges from 69% to 77% when  
641 comparing only MORN sequences in *C. elegans* JPH-1A and human JPH1 through 4.

642 **C)** Bright field images of L4 stage animals of genotypes indicated. Compared to wild type  
643 animals *jph-1(ju1683)* animals are small, thin, and pale, all of which was rescued by transgenic  
644 expression of a fosmid containing genomic *jph-1* (*juEx3390*), JPH-1A expressed under the *jph-1*  
645 promoter [*Pjph-1-GFP::JPH-1A(juSi387)*], or JPH-1A expressed in the pharyngeal muscle [*Pmyo-*  
646 *2-GFP::JPH-1A(juEx8041)*]. Scale bar 100  $\mu$ m.

647 **Figure 2. JPH-1A co-localizes with calcium channels UNC-68 and EGL-19 in muscles and MCS**  
648 **protein ESYT-2 in neurons.**

649 **A-D:** Confocal images of GFP::JPH-1A expressed under the *jph-1* promoter as a single copy  
650 insertion [*Pjph-1-GFP::JPH-1A(juSi387)*] in L4 stage animals.

651 **A)** Maximum intensity projection of the head showing GFP::JPH-1A expression in body wall  
652 muscle, pharynx muscle, and neurons. Arrow indicates nerve ring.

653 **B)** Single plane image of body wall muscle. JPH-1A localizes to rows of dots that run parallel to  
654 muscle striations.

655 **C)** Single plane image of head ganglia neurons. JPH-1A in neuronal cell bodies is excluded from  
656 the nucleus and is concentrated in puncta. Arrowheads indicate some of the neurons  
657 expressing GFP::JPH-1A.

658 **D)** Single plane image of tail ganglia. Arrowheads indicate neurons expressing GFP::JPH-1A.  
659 Arrow indicates PLM cell body. Asterisks mark body wall muscle.

660 **E)** Maximum intensity projection of GFP::JPH-1A [*Pjph-1-GFP::JPH-1A(juEx7999)*] in the ventral  
661 nerve cord in an L4 stage *jph-1(ju1683)* animal. Arrowheads indicate neuronal cell bodies.  
662 Fluorescent blobs outside the cells are autofluorescent particles in the gut.

663 **F-H:** JPH-1A co-localizes with UNC-68 in body wall muscle. Single plane confocal images of an L4  
664 stage animal with split-GFP knock-in *unc-68 (nu664)* expressing muscle GFP1-10 [*Pmyo-3-GFP1-10(nuSi144)*]  
665 and mKate2::JPH-1A expressed under the *jph-1* promoter [*Pjph-1-mKate2::JPH-1A(juEx8103)*].  
666

667 **I-K:** JPH-1A co-localizes with EGL-19. Single plane confocal images of an L4 stage animal with  
668 split-GFP knock-in *egl-19 (nu674)* expressing muscle GFP1-10 [*Pmyo-3-GFP1-10(nuSi144)*] and  
669 mKate2::JPH-1A expressed under the *jph-1* promoter [*Pjph-1-mKate2::JPH-1A(juEx8103)*].

670 **L-N:** JPH-1A localizes to ER-PM contact sites labeled by ESYT-2 in the cell body. Single plane  
671 confocal images of an L4 animal expressing mKate2-tagged ESYT-2 under the *mec-4* touch  
672 neuron specific promoter [*Pmec-4-mKate2::ESYT-2(juls540)*] and GFP::JPH-1A under the *jph-1*  
673 promoter [*Pjph-1-GFP::JPH-1A(juSi387)*]. PLM cell body outlined by dashed line.

674 **O)** Close-up of panel N showing partial colocalization of JPH-1A and ESYT-2 in the PLM cell body.



675 **P)** Close up of the box in Panel N shows that both ESYT-2 and JPH-1A are in the PLM axon.  
676 In all images, anterior is to the left, dorsal is up. Scale bars, 5  $\mu$ m.

677

678 **Figure 3. *jph-1* is required in the pharyngeal muscle for normal rate and strength of pumping.**

679 **A)** *jph-1* is required for normal pharyngeal pumping rate. *jph-1(ju1683)* mutants had reduced  
680 pumping rate, which was rescued by expression of JPH-1A by the *jph-1* promoter [*Pjph-1*-  
681 GFP::*JPH-1A(juSi387)*] but not by expression in the pharyngeal muscle [*Pmyo-2*-GFP::*JPH*-  
682 *1A(juEx8041)*]. *eat-4(ky5)* loss-of-function mutants had reduced pumping rate, as previously  
683 reported (Lee et al., 1999). Number of animals per genotype indicated above X-axis tick marks.  
684 Data are shown as individual data points and mean $\pm$ SEM. Statistics: Non-parametric Kruskal-  
685 Wallis test with Dunn's multiple comparison test. ns not significant, \* $p < 0.05$ , \*\* $p < 0.01$ .

686 **B)** Pumping strength was determined by the distance moved by the grinder. The image on the  
687 left shows the head of the animal just before the pump is initiated, with the grinder position  
688 indicated by the arrow. The image on the right shows the animal mid-pump when the grinder  
689 has moved to its fullest extent. The distance moved by the grinder between the two images was  
690 normalized to the total length of the pharynx to quantify pumping strength. Scale bar, 25  $\mu$ m.

691 **C)** Quantification of pharyngeal pumping strength. *jph-1(ju1683)* mutants had substantially  
692 reduced grinder movement, which was rescued by expression of JPH-1A by the *jph-1* promoter  
693 [*Pjph-1*-GFP::*JPH-1A(juSi387)*] or in the pharyngeal muscle [*Pmyo-2*-GFP::*JPH-1A(juEx8041)*].  
694 Number of animals per genotype indicated below X-axis tick marks. Data are shown as  
695 individual data points and mean $\pm$ SEM. Statistics: One-way ANOVA with Tukey's post-test. ns  
696 not significant, \*\*\* $p < 0.001$ .

697

698 **Figure 4. *jph-1* is required in the body wall muscle for locomotion.**

699 **A)** L4 stage wild type animals exhibit smooth sinusoidal movement and posture while *jph*-  
700 *1(ju1683)* animals assume unusually straight body positions (shown here) and unusually tight  
701 sinusoidal or curled positions. Scale bar, 100  $\mu$ m.

702 **B)** *jph-1(ju1683)* null mutants thrash less frequently than wild-type N2 animals. Thrashing rate  
703 was rescued by expression of a fosmid containing *jph-1(juEx3390)* and partially rescued by  
704 expression of JPH-1A by the *jph-1* promoter [*Pjph-1-GFP::JPH-1A(juSi387)*]. Expression of JPH-1A  
705 in body wall muscle [*Pmyo-3-GFP::JPH-1A(juEx8023)*] rescued thrashing rate, but expression in  
706 neurons [*Prab-3-GFP::JPH-1A(juSi389)*] did not. Expression of JPH-1A in the pharyngeal muscle  
707 [*Pmyo-2-GFP::JPH-1A(juEx8041)*] slightly decreased thrashing rate. Number of animals per  
708 genotype indicated below X-axis tick marks. Data are shown as individual data points and  
709 mean±SEM. Statistics: One-way ANOVA with Tukey's post-test. ns not significant, \*\*\*p<0.001.

710

711 **Figure 5. *jph-1* promotes touch neuron PLM axon regeneration cell non-autonomously.**

712 **A)** Representative confocal images of PLM axon regrowth 24 h post-axotomy in animals  
713 expressing the touch neuron marker *Pmec-7-GFP(muls32)*. Genotype in the bottom image is  
714 *jph-1(ju1683); Pjph-1-GFP::JPH-1A(juSi387)*. Anterior is to the left, dorsal is up. Arrows indicate  
715 the site of axon injury. Scale bar, 20 μm.

716 **B)** *jph-1* is required in the pharyngeal muscle for touch neuron axon regeneration. Distance  
717 regrown by PLM axon 24 h post-injury, normalized to wild-type regrowth. *jph-1(ok2823)* axon  
718 regrowth was not significantly different from wild type [*Pmec-7-GFP(muls32)*]. *jph-1(ju1683)*  
719 animals had significantly reduced regrowth. Expression of JPH-1A by the *jph-1* promoter [*Pjph-*  
720 *1-GFP::JPH-1A(juSi387)*] or in the pharyngeal muscle [*Pmyo-2-GFP::JPH-1A(juEx8041)*] rescued  
721 the reduced regrowth of *jph-1(ju1683)* mutants. Expression of JPH-1A in the touch receptor  
722 neurons [*Pmec-4-GFP::JPH-1A(juSi388)*] did not rescue axon regeneration. Number of animals  
723 per genotype indicated below X-axis tick marks. Data are shown as individual data points and  
724 mean±SEM. Statistics: Non-parametric Kruskal-Wallis test with Dunn's multiple comparison  
725 test. ns not significant, \*\*\*p<0.001.

726

727 **Figure 6. *jph-1* and *esyt-2* null mutants are aldicarb resistant and exhibit mutual suppression.**

728 **A)** *jph-1(ju1683)* animals are resistant to aldicarb compared to wild-type animals. Aldicarb

729 resistance was rescued by expression of a fosmid containing *jph-1* genomic DNA (*juEx3390*).  
730 Statistical significance shown between *jph-1(ju1683)* and *jph-1;Ex[jph-1(+)] fosmid*.  
731 **B)** *esyt-2(ju1409)* animals are resistant to aldicarb compared to wild-type animals. Aldicarb  
732 resistance was rescued by expression of *esyt-2* genomic DNA (*juEx7581*). Statistical significance  
733 shown between *esyt-2(ju1409)* and *esyt-2;Ex[esyt-2 gDNA]*.  
734 **C)** *jph-1(ju1683);esyt-2(ju1409)* double mutants exhibit a wild-type response to aldicarb.  
735 Statistical significance shown between *jph-1(ju1683)* and *jph-1;esyt-2*.  
736 **D)** Expression of *esyt-2* genomic DNA (*juEx7581*) restores aldicarb resistance to *jph-1(ju1683);*  
737 *esyt-2(ju1409)* double mutants. Statistical significance shown between *jph-1;esyt-2* and *jph-*  
738 *1;esyt-2;Ex[esyt-2 gDNA]*.  
739 13-15 animals tested per genotype per trial, n=3 trials. Data are shown as individual data points  
740 and mean±SEM. Statistics: One-way ANOVA with Tukey's post-test. ns not significant, \*p<0.05,  
741 \*\*p<0.01, \*\*\*p<0.001.

742

743 **Figure 7. *unc-68* is required for JPH-1A localization.**

744 Shown are single-plane confocal images of GFP::JPH-1A expressed under the *jph-1* promoter  
745 [*Pjph-1-GFP::JPH-1A(juEx7999)*] in wild-type (WT), *unc-2(e55)*, and *unc-68(e540)* backgrounds.  
746 **A)** In the body wall muscle, JPH-1A localizes to row of puncta in WT and *unc-2(e55)* animals,  
747 while in *unc-68(e540)* animals JPH-1A puncta are less distinct.  
748 **B)** In neurons of the head ganglia, JPH-1A localizes to reticulate structures surrounding the  
749 nucleus and forms puncta in the cell periphery of WT and *unc-2(e55)* animals, but not *unc-*  
750 *68(e540)* mutants. Arrows mark some of the GFP::JPH-1A puncta.  
751 WT and *unc-2(e55)* images were taken at 2% laser power and *unc-68(e55)* was taken at 4.5%  
752 laser power to compensate for the slight variation in expression level. Scale bar, 5 µm.

753

754

755 **Supplemental Figure 1. Comparison of genomic sequences concerning the intron retained in**  
756 **JPH-1B.**

757 **A)** Top: Exon-intron diagrams for *C. elegans jph-1* isoform A and B.

758 Bottom: We performed a BLASTn search of *C. elegans jph-1* against 26 *Caenorhabditis* genomes  
759 published on Caenorhabditis.org. Aligned sequences are thick black lines and unaligned  
760 sequences are thin black lines. Darker lines indicate stronger hits. Boundaries between aligned  
761 and unaligned regions often match up with exon-intron boundaries. 10 *Caenorhabditis*  
762 sequences align with the intron retained in JPH-1B.

763 **B)** We translated the introns of these 10 species in the same reading frame as *C. elegans jph-1*  
764 and aligned the amino acid sequences using MUSCLE (Madeira et al., 2019). The sequences vary  
765 in length because most encounter stop codons, except for sister species *C. sp32* and *C. afra*,  
766 which have no stop codons in the intron and are in frame with the following exon. Beyond the  
767 first three amino acids there is little amino acid conservation between sequences.

768

769 **Supplemental Figure 2. Expression pattern of a *jph-1* transcriptional reporter and a JPH-1B**  
770 **translational fusion reporter.**

771 **A)** *jph-1* is expressed in neurons and most muscles. Top: Illustration of *jph-1* promoter::GFP  
772 expression construct [*Pjph-1*-GFP(*juEx8013* and *juEx8014*)]. Bottom: GFP expression was seen in  
773 head ganglia neurons and pharyngeal, body wall, vulval, uterine, stomatointestinal, anal  
774 sphincter, and anal depressor muscles. The large fluorescent circle marked by an asterisk is a  
775 coelomocyte labeled by the coinjection marker [*Punc-122*-RFP].

776 **B)** *jph-1* localization in an L1 stage animal. Top: Illustration of expression construct [*Pjph-1*-  
777 GFP::JPH-1A(*juSi387*)]. Bottom: Confocal images of an L1 stage animal. A plane near the surface  
778 of the animal shows expression in the body wall muscle, while a plane taken through the  
779 middle of the animal shows expression in the pharyngeal muscle and head ganglia neurons.

780 **C)** JPH-1B has a diffuse localization. Top: Illustration of construct expressing *jph-1b* cDNA under  
781 the *jph-1* promoter [*Pjph-1*-GFP::JPH-1B(*juEx8038*)]. Bottom: Confocal projection of an L4 stage

782 animal head shows a diffuse localization in neurons and muscles.

783 Scale bars 20  $\mu$ m.

784

785 **Supplemental Figure 3. *jph-1(0)* mutants do not alter touch neuron morphology or enhance**  
786 **axon fusion after injury.**

787 **A)** Touch neuron morphology is normal in *jph-1(ju1683)* animals. Representative images of wild-  
788 type and *jph-1(ju1683)* day-1 adult animals expressing the touch neuron marker *Pmec-7-*  
789 *GFP(muls32)*. Labels indicate ALM, PLM, AVM, and PVM neuron cell bodies. The bright spot  
790 below the *jph-1(ju1683)* ALM cell body is likely fluorescence from the ALM on the opposite side  
791 of the body. Scale bar, 100  $\mu$ m.

792 **B)** Distance regrown by PLM axon 24h post-injury. Control animals expressed GFP Degron in the  
793 touch neurons. *jph-1(ju1683)* animals expressing GFP-tagged JPH-1A under the *jph-1* promoter  
794 [*Pjph-1-GFP::JPH-1A(juSi387)*] also expressed GFP Degron in the touch neurons, predicted to  
795 degrade GFP::JPH-1 specifically in touch neurons. There was no statistically significant  
796 difference between groups. Number of animals per genotype indicated below X-axis tick marks.  
797 Data are shown as individual data points and mean $\pm$ SEM. Statistics: Student's t-test. ns not  
798 significant.

799 **C)** Percentage of animals with axon-axon fusion 24h post-injury. *jph-1(ok2823)* mutants had  
800 increased axon fusion while null mutants *ju1683* and *ju1684* exhibited wild-type levels of axon  
801 fusion. Number of animals per genotype indicated below X-axis tick marks. Statistics: Fisher's  
802 exact test performed pairwise. ns not significant, \*\*p<0.01.

803 **D)** JPH-1(*ok2823*) localizes to the nucleus. Top: Illustration of construct expressing *jph-*  
804 *1(ok2823)* cDNA from original start to stop codon under the *jph-1* promoter [*Pjph-1-GFP::JPH-*  
805 *1(ok2823)(juEx8035)*]. A premature stop codon in the middle of JPH-1(*ok2823*) truncates the C-  
806 terminal two-thirds of the protein. Bottom: Confocal projection of L4-stage animal tail with  
807 arrows indicating neuronal nuclei labeled by JPH-1(*ok2823*). Scale bar, 20  $\mu$ m.

808

809 **Supplemental Figure 4. *jph-1* is expressed in cholinergic motor neurons and touch receptor**  
810 **neurons.**

811 **A)** *jph-1* is expressed in cholinergic neurons. Single plane confocal image of ventral nerve cord  
812 of L4 animal expressing mCherry in cholinergic neurons [*Punc-17-mCherry(nuls321)*] and JPH-1A  
813 under the *jph-1* promoter [*Pjph-1-GFP::JPH-1A(juEx7999)*]. Red arrows indicate cholinergic  
814 neuron cell bodies. Green arrowheads indicate JPH-1A puncta in cholinergic neurons. Scale bar,  
815 10  $\mu$ m.

816 **B)** JPH-1A is present where the PLM touch receptor neuron synapses onto the ventral nerve  
817 cord. Confocal projection of JPH-1A expressed in touch neurons [*Pmec-4-GFP::JPH-1A(juSi388)*].  
818 Scale bar, 10  $\mu$ m.

819

820 **Supplemental Figure 5. Additional data on pharmacological responses of *jph-1(0)* and *jph-***  
821 ***1(0)*; *esyt-2(0)***

822 **A)** *jph-1* null mutants *ju1683* and *ju1684* have the same response to levamisole as wild type  
823 animals.

824 **B)** *jph-1* null mutants *ju1683* and *ju1684* are both aldicarb resistant. Statistical significance  
825 shown between *jph1-(ju1684)* and wild type.

826 **C)** *jph-1(ju1684);esyt-2(ju1408)* double mutants exhibit a wild-type response to aldicarb.  
827 Statistical significance shown between *jph-1(ju1684)* and *jph-1;esyt-2*.

828 **D)** *esyt-2(ju1409)* animals are levamisole resistant compared to wild-type animals. Statistical  
829 significance shown between *esyt-2(ju1409)* and wild type.

830 13-15 animals tested per genotype per trial, n=3 trials. Data are shown as individual data points  
831 and mean $\pm$ SEM. Statistics: One-way ANOVA with Tukey's post-test. ns not significant, \*p<0.05,  
832 \*\*p<0.01, \*\*\*p<0.001.

833

834 **Supplemental Figure 6. JPH-1A localization is unaltered in *esyt-2(0)***

835 Shown are single-plane confocal images of GFP::JPH-1A expressed under the *jph-1* promoter

836 [*Pjph-1*-GFP::*JPH-1A(juSi387)*] in wild-type and *esyt-2(ju1409)* backgrounds.

837 **A)** In the body wall muscle, *JPH-1A* localizes to rows of puncta in wild type and *esyt-2(ju1409)*  
838 animals.

839 **B)** In neurons of the head ganglia, *JPH-1A* localizes to reticulate structures surrounding the  
840 nucleus and forms puncta in the cell periphery of wild type and *esyt-2(ju1409)* animals. Arrows  
841 mark some of the GFP::*JPH-1A* puncta.

842 Scale bar, 5  $\mu$ m.

843 **References**

- 844 Andrusiak MG, Sharifnia P, Lyu X, Wang Z, Dickey AM, Wu Z, Chisholm AD, Jin Y. 2019. Inhibition  
845 of Axon Regeneration by Liquid-like TIAR-2 Granules. *Neuron* **104**:290-304.e8.  
846 doi:10.1016/j.neuron.2019.07.004
- 847 Avery L. 1993. The genetics of feeding in *Caenorhabditis elegans*. *Genetics* **133**:897–917.
- 848 Avery L, Horvitz HR. 1989. Pharyngeal pumping continues after laser killing of the pharyngeal  
849 nervous system of *C. elegans*. *Neuron* **3**:473–485. doi:10.1016/0896-6273(89)90206-7
- 850 Avery L, You Y-J. 2012. *C. elegans* feeding. *WormBook* 1–23. doi:10.1895/wormbook.1.150.1
- 851 Beavers DL, Wang W, Ather S, Voigt N, Garbino A, Dixit SS, Landstrom AP, Li N, Wang Q,  
852 Olivotto I, Dobrev D, Ackerman MJ, Wehrens XHT. 2013. Mutation E169K in junctophilin-2  
853 causes atrial fibrillation due to impaired RyR2 stabilization. *J Am Coll Cardiol* **62**:2010–  
854 2019. doi:10.1016/j.jacc.2013.06.052
- 855 Brenner S. 1974. The genetics of *Caenorhabditis elegans*. *Genetics* **77**:71–94.
- 856 Calpena E, Del Amo VL, Chakraborty M, Llamusi B, Artero R, Espinós C, Galindo MI. 2018. The  
857 *Drosophila* junctophilin gene is functionally equivalent to its four mammalian counterparts  
858 and is a modifier of a Huntingtin poly-Q expansion and the Notch pathway. *DMM Dis*  
859 *Model Mech* **11**. doi:10.1242/dmm.029082
- 860 Chen B, Guo A, Zhang C, Chen R, Zhu Y, Hong J, Kutschke W, Zimmerman K, Weiss RM, Zingman  
861 L, Anderson ME, Wehrens XHT, Song LS. 2013. Critical roles of junctophilin-2 in T-tubule  
862 and excitation-contraction coupling maturation during postnatal development. *Cardiovasc*  
863 *Res* **100**:54–62. doi:10.1093/cvr/cvt180
- 864 El-Gebali S, Mistry J, Bateman A, Eddy SR, Luciani A, Potter SC, Qureshi M, Richardson LJ, Salazar  
865 GA, Smart A, Sonnhammer ELL, Hirsh L, Paladin L, Piovesan D, Tosatto SCE, Finn RD. 2019.  
866 The Pfam protein families database in 2019. *Nucleic Acids Res* **47**:D427–D432.  
867 doi:10.1093/nar/gky995
- 868 El Mouridi S, Lecroisey C, Tardy P, Mercier M, Leclercq-Blondel A, Zariohi N, Boulin T. 2017.



- 869 Reliable CRISPR/Cas9 genome engineering in *Caenorhabditis elegans* using a single  
870 efficient sgRNA and an easily recognizable phenotype. *G3 Genes, Genomes, Genet* **7**:1429–  
871 1437. doi:10.1534/g3.117.040824
- 872 Frøkjær-Jensen C, Davis MW, Sarov M, Taylor J, Flibotte S, LaBella M, Pozniakovsky A, Moerman  
873 DG, Jorgensen EM. 2014. Random and targeted transgene insertion in *Caenorhabditis*  
874 *elegans* using a modified Mos1 transposon. *Nat Methods* **11**:529–534.  
875 doi:10.1038/nmeth.2889
- 876 Frøkjær-Jensen C, Wayne Davis M, Hopkins CE, Newman BJ, Thummel JM, Olesen SP, Grunnet  
877 M, Jorgensen EM. 2008. Single-copy insertion of transgenes in *Caenorhabditis elegans*. *Nat*  
878 *Genet* **40**:1375–1383. doi:10.1038/ng.248
- 879 Garbino A, Van Oort RJ, Dixit SS, Landstrom AP, Ackerman MJ, Wehrens XHT. 2009. Molecular  
880 evolution of the junctophilin gene family. *Physiol Genomics* **37**:175–186.  
881 doi:10.1152/physiolgenomics.00017.2009
- 882 Ghosh-Roy A, Wu Z, Goncharov A, Jin Y, Chisholm AD. 2010. Calcium and cyclic AMP promote  
883 axonal regeneration in *Caenorhabditis elegans* and require DLK-1 kinase. *J Neurosci*  
884 **30**:3175–3183. doi:10.1523/JNEUROSCI.5464-09.2010
- 885 Giordano F, Saheki Y, Idevall-Hagren O, Colombo SF, Pirruccello M, Milosevic I, Gracheva EO,  
886 Bagriantsev SN, Borgese N, De Camilli P. 2013. PI(4,5)P2-Dependent and Ca<sup>2+</sup>-Regulated  
887 ER-PM interactions mediated by the extended synaptotagmins. *Cell* **153**:1494–1509.  
888 doi:10.1016/j.cell.2013.05.026
- 889 Gjorgjieva J, Biron D, Haspel G. 2014. Neurobiology of *Caenorhabditis elegans* locomotion:  
890 Where do we stand? *Bioscience* **64**:476–486. doi:10.1093/biosci/biu058
- 891 Golini L, Chouabe C, Berthier C, Cusimano V, Fornaro M, Bonvallet R, Formoso L, Giacomello E,  
892 Jacquemond V, Sorrentino V. 2011. Junctophilin 1 and 2 proteins interact with the L-type  
893 Ca<sup>2+</sup> channel dihydropyridine receptors (DHPRs) in skeletal muscle. *J Biol Chem*  
894 **286**:43717–43725. doi:10.1074/jbc.M111.292755

- 895 Goodman MB, Hall DH, Avery L, Lockery SR. 1998. Active currents regulate sensitivity and  
896 dynamic range in *C. elegans* neurons. *Neuron* **20**:763–772. doi:10.1016/S0896-  
897 6273(00)81014-4
- 898 Guo A, Wang Yihui, Chen B, Wang Yunhao, Yuan J, Zhang L, Hall D, Wu J, Shi Y, Zhu Q, Chen C,  
899 Thiel WH, Zhan X, Weiss RM, Zhan F, Musselman CA, Pufall M, Zhu W, Au KF, Hong J,  
900 Anderson ME, Grueter CE, Song LS. 2018. E-C coupling structural protein junctophilin-2  
901 encodes a stress-adaptive transcription regulator. *Science (80- )* **362**:1–14.  
902 doi:10.1126/science.aan3303
- 903 Hirata Y, Brotto M, Weisleder N, Chu Y, Lin P, Zhao X, Thornton A, Komazaki S, Takeshima H, Ma  
904 J, Pan Z. 2006. Uncoupling store-operated Ca<sup>2+</sup> entry and altered Ca<sup>2+</sup> release from  
905 sarcoplasmic reticulum through silencing of junctophilin genes. *Biophys J* **90**:4418–4427.  
906 doi:10.1529/biophysj.105.076570
- 907 Hirve N, Rajanikanth V, Hogan PG, Gudlur A. 2018. Coiled-Coil Formation Conveys a STIM1  
908 Signal from ER Lumen to Cytoplasm. *Cell Rep* **22**:72–83. doi:10.1016/j.celrep.2017.12.030
- 909 Huang YC, Pirri JK, Rayes D, Gao S, Mulcahy B, Grant J, Saheki Y, Francis MM, Zhen M, Alkema  
910 MJ. 2019. Gain-of-function mutations in the UNC-2/CaV2 $\alpha$  channel lead to excitation-  
911 dominant synaptic transmission in *C. elegans*. *Elife* **8**:1–28. doi:10.7554/eLife.45905
- 912 Ito K, Komazaki S, Sasamoto K, Yoshida M, Nishi M, Kitamura K, Takeshima H. 2001. Deficiency  
913 of triad junction and contraction in mutant skeletal muscle lacking junctophilin type 1. *J*  
914 *Cell Biol* **154**:1059–1067. doi:10.1083/jcb.200105040
- 915 Kakizawa S, Kishimoto Y, Hashimoto K, Miyazaki T, Furutani K, Shimizu H, Fukaya M, Nishi M,  
916 Sakagami H, Ikeda A, Kondo H, Kano M, Watanabe M, Iino M, Takeshima H. 2007.  
917 Junctophilin-mediated channel crosstalk essential for cerebellar synaptic plasticity. *EMBO J*  
918 **26**:1924–1933. doi:10.1038/sj.emboj.7601639
- 919 Kigerl KA, Zane K, Adam K, Sullivan MB, Popovich PG. 2020. The spinal cord-gut-immune axis as  
920 a master regulator of health and neurological function after spinal cord injury. *Exp Neurol*  
921 **323**.

- 922 Kikuma K, Li X, Kim D, Sutter D, Dickman DK. 2017. Extended synaptotagmin localizes to  
923 presynaptic ER and promotes neurotransmission and synaptic growth in *Drosophila*.  
924 *Genetics* **207**:993–1006. doi:10.1534/genetics.117.300261
- 925 Kim KW, Tang NH, Piggott CA, Andrusiak MG, Park S, Zhu M, Kurup N, Cherra SJ, Wu Z, Chisholm  
926 AD, Jin Y. 2018. Expanded genetic screening in *Caenorhabditis elegans* identifies new  
927 regulators and an inhibitory role for NAD<sup>+</sup> in axon regeneration. *Elife* **7**.  
928 doi:10.7554/eLife.39756
- 929 Kobuna H, Inoue T, Shibata M, Gengyo-Ando K, Yamamoto A, Mitani S, Arai H. 2010.  
930 Multivesicular body formation requires OSBP-related proteins and cholesterol. *PLoS Genet*  
931 **6**. doi:10.1371/journal.pgen.1001055
- 932 Lainé V, Ségor JR, Zhan H, Bessereau JL, Jospin M. 2014. Hyperactivation of L-type voltage-gated  
933 Ca<sup>2+</sup> channels in *Caenorhabditis elegans* striated muscle can result from point mutations  
934 in the IS6 or the IIS4 segment of the  $\alpha$ 1 subunit. *J Exp Biol* **217**:3805–3814.  
935 doi:10.1242/jeb.106732
- 936 Landstrom AP, Beavers DL, Wehrens XHT. 2014. The junctophilin family of proteins: From bench  
937 to bedside. *Trends Mol Med* **20**:353–362. doi:10.1016/j.molmed.2014.02.004
- 938 Landstrom AP, Kellen CA, Dixit SS, Van Oort RJ, Garbino A, Weisleder N, Ma J, Wehrens XHT,  
939 Ackerman MJ. 2011. Junctophilin-2 expression silencing causes cardiocyte hypertrophy  
940 and abnormal intracellular calcium-handling. *Circ Hear Fail* **4**:214–223.  
941 doi:10.1161/CIRCHEARTFAILURE.110.958694
- 942 Lang AB, John Peter ATAT, Walter P, Kornmann B. 2015. ER-mitochondrial junctions can be  
943 bypassed by dominant mutations in the endosomal protein Vps13. *J Cell Biol* **210**:883–890.  
944 doi:10.1083/jcb.201502105
- 945 Lee RYN, Lobel L, Hengartner M, Horvitz HR, Avery L. 1997. Mutations in the  $\alpha$ 1 subunit of an L-  
946 type voltage-activated Ca<sup>2+</sup> channel cause myotonia in *Caenorhabditis elegans*. *EMBO J*  
947 **16**:6066–6076. doi:10.1093/emboj/16.20.6066

- 948 Lee RYN, Sawin ER, Chalfie M, Horvitz HR, Avery L. 1999. EAT-4, a Homolog of a Mammalian  
949 Sodium-Dependent Inorganic Phosphate Cotransporter, Is Necessary for Glutamatergic  
950 Neurotransmission in *Caenorhabditis elegans*. *J Neurosci* **19**:159–167.
- 951 Letunic I, Bork P. 2018. 20 years of the SMART protein domain annotation resource. *Nucleic  
952 Acids Res* **46**:D493–D496. doi:10.1093/nar/gkx922
- 953 Lewis JA, Wu CH, Berg H, Levine JH. 1980. The genetics of levamisole resistance in the  
954 nematode *Caenorhabditis elegans*. *Genetics* **95**:905–928.
- 955 Li H, Ding X, Lopez JR, Takeshima H, Ma J, Allen PD, Eltit JM. 2010. Impaired Orai1-mediated  
956 resting Ca<sup>2+</sup> entry reduces the cytosolic [Ca<sup>2+</sup>] and sarcoplasmic reticulum Ca<sup>2+</sup> loading in  
957 quiescent junctophilin 1 knock-out myotubes. *J Biol Chem* **285**:39171–39179.  
958 doi:10.1074/jbc.M110.149690
- 959 Liu Q, Chen B, Yankova M, Morest DK, Maryon E, Hand AR, Nonet ML, Wang ZW. 2005.  
960 Presynaptic ryanodine receptors are required for normal quantal size at the  
961 *Caenorhabditis elegans* neuromuscular junction. *J Neurosci* **25**:6745–6754.  
962 doi:10.1523/JNEUROSCI.1730-05.2005
- 963 Madeira F, Park YM, Lee J, Buso N, Gur T, Madhusoodanan N, Basutkar P, Tivey ARN, Potter SC,  
964 Finn RD, Lopez R. 2019. The EMBL-EBI search and sequence analysis tools APIs in 2019.  
965 *Nucleic Acids Res* **47**:W636–W641. doi:10.1093/nar/gkz268
- 966 Manford AG, Stefan CJ, Yuan HL, MacGurn JA, Emr SD. 2012. ER-to-Plasma Membrane Tethering  
967 Proteins Regulate Cell Signaling and ER Morphology. *Dev Cell* **23**:1129–1140.  
968 doi:10.1016/j.devcel.2012.11.004
- 969 Maryon EB, Coronado R, Anderson P. 1996. unc-68 encodes a ryanodine receptor involved in  
970 regulating *C. elegans* body-wall muscle contraction. *J Cell Biol* **134**:885–893.  
971 doi:10.1083/jcb.134.4.885
- 972 Maryon EB, Saari B, Anderson P. 1998. Muscle-specific functions of ryanodine receptor  
973 channels in *Caenorhabditis elegans*. *J Cell Sci* **111**:2885–2895.

- 974 Mathews EA, García E, Santi CM, Mullen GP, Thacker C, Moerman DG, Snutch TP. 2003. Critical  
975 residues of the *Caenorhabditis elegans* unc-2 voltage-gated calcium channel that affect  
976 behavioral and physiological properties. *J Neurosci* **23**:6537–6545.  
977 doi:10.1523/JNEUROSCI.23-16-06537.2003
- 978 Mello CC, Kramer JM, Stinchcomb D, Ambros V. 1991. Efficient gene transfer in *C.elegans*:  
979 Extrachromosomal maintenance and integration of transforming sequences. *EMBO J*  
980 **10**:3959–3970. doi:10.1002/j.1460-2075.1991.tb04966.x
- 981 Mesmin B, Bigay J, Moser Von Filseck J, Lacas-Gervais S, Drin G, Antony B. 2013. XA four-step  
982 cycle driven by PI(4)P hydrolysis directs sterol/PI(4)P exchange by the ER-Golgi Tether  
983 OSBP. *Cell* **155**:830. doi:10.1016/j.cell.2013.09.056
- 984 Miller KG, Alfonso A, Nguyen M, Crowell JA, Johnson CD, Rand JB. 1996. A genetic selection for  
985 *Caenorhabditis elegans* synaptic transmission mutants. *Proc Natl Acad Sci U S A* **93**:12593–  
986 12598. doi:10.1073/pnas.93.22.12593
- 987 Moriguchi S, Nishi M, Komazaki S, Sakagami H, Miyazaki T, Masumiya H, Saito SY, Watanabe M,  
988 Kondo H, Yawo H, Fukunaga K, Takeshima H. 2006. Functional uncoupling between Ca<sup>2+</sup>  
989 release and afterhyperpolarization in mutant hippocampal neurons lacking junctophilins.  
990 *Proc Natl Acad Sci U S A* **103**:10811–10816. doi:10.1073/pnas.0509863103
- 991 Nakada T, Kashihara T, Komatsu M, Kojima K, Takeshita T, Yamada M. 2018. Physical interaction  
992 of junctophilin and the CaV1.1 C terminus is crucial for skeletal muscle contraction. *Proc*  
993 *Natl Acad Sci U S A* **115**:4507–4512. doi:10.1073/pnas.1716649115
- 994 Nishi M, Mizushima A, Nakagawara K ichi, Takeshima H. 2000. Characterization of human  
995 junctophilin subtype genes. *Biochem Biophys Res Commun* **273**:920–927.  
996 doi:10.1006/bbrc.2000.3011
- 997 Nishi M, Sakagami H, Komazaki S, Kondo H, Takeshima H. 2003. Coexpression of junctophilin  
998 type 3 and type 4 in brain. *Mol Brain Res* **118**:102–110. doi:10.1016/S0169-  
999 328X(03)00341-3

- 1000 Paix A, Folkmann A, Rasoloson D, Seydoux G. 2015. High efficiency, homology-directed genome  
1001 editing in *Caenorhabditis elegans* using CRISPR-Cas9 ribonucleoprotein complexes. *Genetics*  
1002 **201**:47–54. doi:10.1534/genetics.115.179382
- 1003 Phillips MJ, Voeltz GK. 2016. Structure and function of ER membrane contact sites with other  
1004 organelles. *Nat Rev Mol Cell Biol* **17**:69–82. doi:10.1038/nrm.2015.8
- 1005 Phimister AJ, Lango J, Eun HL, Ernst-Russell MA, Takeshima H, Jianjie M, Allen PD, Pessah IN.  
1006 2007. Conformation-dependent stability of junctophilin 1 (JP1) and Ryanodine Receptor  
1007 Type 1 (RyR1) channel complex is mediated by their hyper-reactive thiols. *J Biol Chem*  
1008 **282**:8667–8677. doi:10.1074/jbc.M609936200
- 1009 Porter KR, Palade GE. 1957. STUDIES ON THE ENDOPLASMIC RETICULUM III. Its Form and  
1010 Distribution in Striated Muscle Cells. *J Biophys Biochem Cytol* **3**:269–300.
- 1011 Pritchard HAT, Griffin CS, Yamasaki E, Thakore P, Lane C, Greenstein AS, Earley S. 2019.  
1012 Nanoscale coupling of junctophilin-2 and ryanodine receptors regulates vascular smooth  
1013 muscle cell contractility. *Proc Natl Acad Sci U S A* **116**:21874–21881.  
1014 doi:10.1073/pnas.1911304116
- 1015 Reynolds JO, Chiang DY, Wang W, Beavers DL, Dixit SS, Skapura DG, Landstrom AP, Song LS,  
1016 Ackerman MJ, Wehrens XHT. 2013. Junctophilin-2 is necessary for T-tubule maturation  
1017 during mouse heart development. *Cardiovasc Res* **100**:44–53. doi:10.1093/cvr/cvt133
- 1018 Saeki T, Suzuki Y, Yamamura H, Takeshima H, Imaizumi Y. 2019. A junctophilin-caveolin  
1019 interaction enables efficient coupling between ryanodine receptors and BKCa channels in  
1020 the Ca<sup>2+</sup> microdomain of vascular smooth muscle. *J Biol Chem* **294**:13093–13105.  
1021 doi:10.1074/jbc.RA119.008342
- 1022 Saeki Y, Bargmann CI. 2009. Presynaptic CaV2 calcium channel traffic requires CALF-1 and the  
1023  $\alpha$  2 subunit UNC-36. *Nat Neurosci* **12**:1257–1265. doi:10.1038/nn.2383
- 1024 Saeki Y, De Camilli P. 2017. The Extended-Synaptotagmins. *Biochim Biophys Acta - Mol Cell Res*  
1025 **1864**:1490–1493. doi:10.1016/j.bbamcr.2017.03.013

- 1026 Sahu G, Wazen RM, Colarusso P, Chen SRW, Zamponi GW, Turner RW. 2019. Junctophilin  
1027 Proteins Tether a Cav1-RyR2-KCa3.1 Tripartite Complex to Regulate Neuronal Excitability.  
1028 *Cell Rep* **28**:2427-2442.e6. doi:10.1016/j.celrep.2019.07.075
- 1029 Schafer WR, Sanchez BM, Kenyon CJ. 1996. Genes affecting sensitivity to serotonin in  
1030 *Caenorhabditis elegans*. *Genetics* **143**:1219–1230.
- 1031 Sun L, Shay J, McLoed M, Roodhouse K, Chung SH, Clark CM, Pirri JK, Alkema MJ, Gabel C V.  
1032 2014. Neuronal regeneration in *C. elegans* requires subcellular calcium release by  
1033 ryanodine receptor channels and can be enhanced by optogenetic stimulation. *J Neurosci*  
1034 **34**:15947–15956. doi:10.1523/JNEUROSCI.4238-13.2014
- 1035 Takeshima H, Komazaki S, Nishi M, Iino M, Kangawa K. 2000. Junctophilins: A novel family of  
1036 junctional membrane complex proteins. *Mol Cell* **6**:11–22. doi:10.1016/s1097-  
1037 2765(00)00003-4
- 1038 Trojanowski NF, Fang-Yen C. 2015. Simultaneous Optogenetic Stimulation of Individual  
1039 Pharyngeal Neurons and Monitoring of Feeding Behavior in Intact *C. elegans* In: Biron D,  
1040 Haspel G, editors. *C. elegans: Methods and Applications*. Totowa, NJ: Humana Press. pp.  
1041 105–119. doi:10.1007/978-1-4939-2842-2\_9
- 1042 Valm AM, Cohen S, Legant WR, Melunis J, Hershberg U, Wait E, Cohen AR, Davidson MW, Betzig  
1043 E, Lippincott-Schwartz J. 2017. Applying systems-level spectral imaging and analysis to  
1044 reveal the organelle interactome. *Nature* **546**:162–167. doi:10.1038/nature22369
- 1045 Van Oort RJ, Garbino A, Wang W, Dixit SS, Landstrom AP, Gaur N, De Almeida AC, Skapura DG,  
1046 Rudy Y, Burns AR, Ackerman MJ, Wehrens XHT. 2011. Disrupted junctional membrane  
1047 complexes and hyperactive ryanodine receptors after acute junctophilin knockdown in  
1048 mice. *Circulation* **123**:979–988. doi:10.1161/CIRCULATIONAHA.110.006437
- 1049 Von Stetina SE, Treinin M, Miller DM. 2006. The Motor Circuit. *Int Rev Neurobiol* **69**:125–167.  
1050 doi:10.1016/S0074-7742(05)69005-8
- 1051 Wang S, Tang NH, Lara-Gonzalez P, Zhao Z, Cheerambathur DK, Prevo B, Chisholm AD, Desai A,

- 1052 Oegema K. 2017. A toolkit for GFP-mediated tissue-specific protein degradation in *C.*  
1053 *elegans*. *Dev* **144**:2694–2701. doi:10.1242/dev.150094
- 1054 Woo JS, Kim DH, Allen PD, Lee EH. 2008. TRPC3-interacting triadic proteins in skeletal muscle.  
1055 *Biochem J* **411**:399–405. doi:10.1042/BJ20071504
- 1056 Wu Z, Ghosh-Roy A, Yanik MF, Zhang JZ, Jin Y, Chisholm AD. 2007. *Caenorhabditis elegans*  
1057 neuronal regeneration is influenced by life stage, ephrin signaling, and synaptic branching.  
1058 *Proc Natl Acad Sci U S A* **104**:15132–15137. doi:10.1073/pnas.0707001104
- 1059 Yoshida M, Sugimoto A, Ohshima Y, Takeshima H. 2001. Important role of junctophilin in  
1060 nematode motor function. *Biochem Biophys Res Commun* **289**:234–239.  
1061 doi:10.1006/bbrc.2001.5951
- 1062 Ziman AP, Gómez-Viquez NL, Bloch RJ, Lederer WJ. 2010. Excitation-contraction coupling  
1063 changes during postnatal cardiac development. *J Mol Cell Cardiol* **48**:379–386.  
1064 doi:10.1016/j.yjmcc.2009.09.016
- 1065



# Figure 1

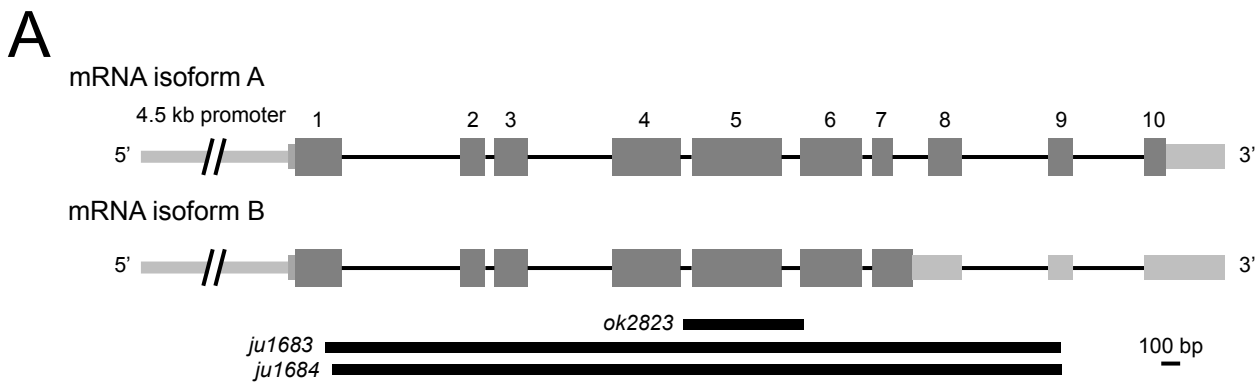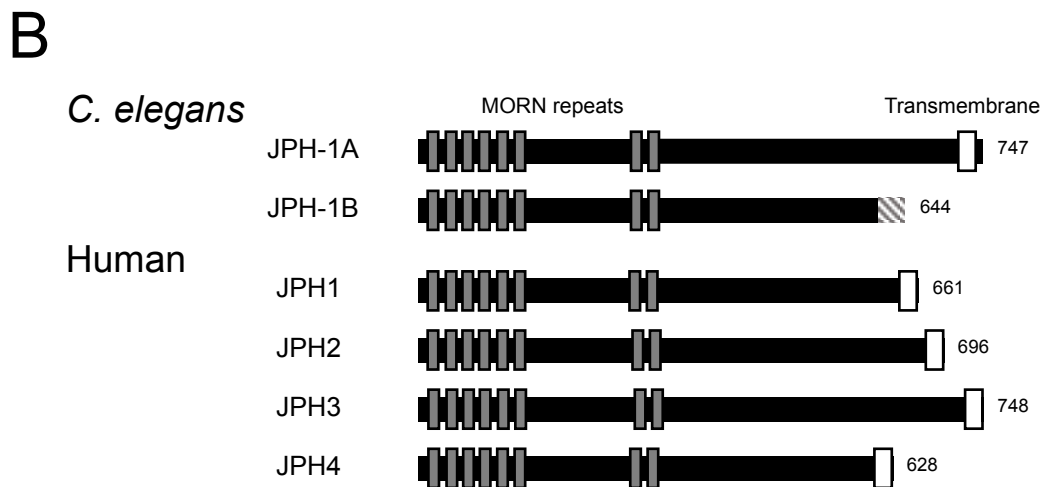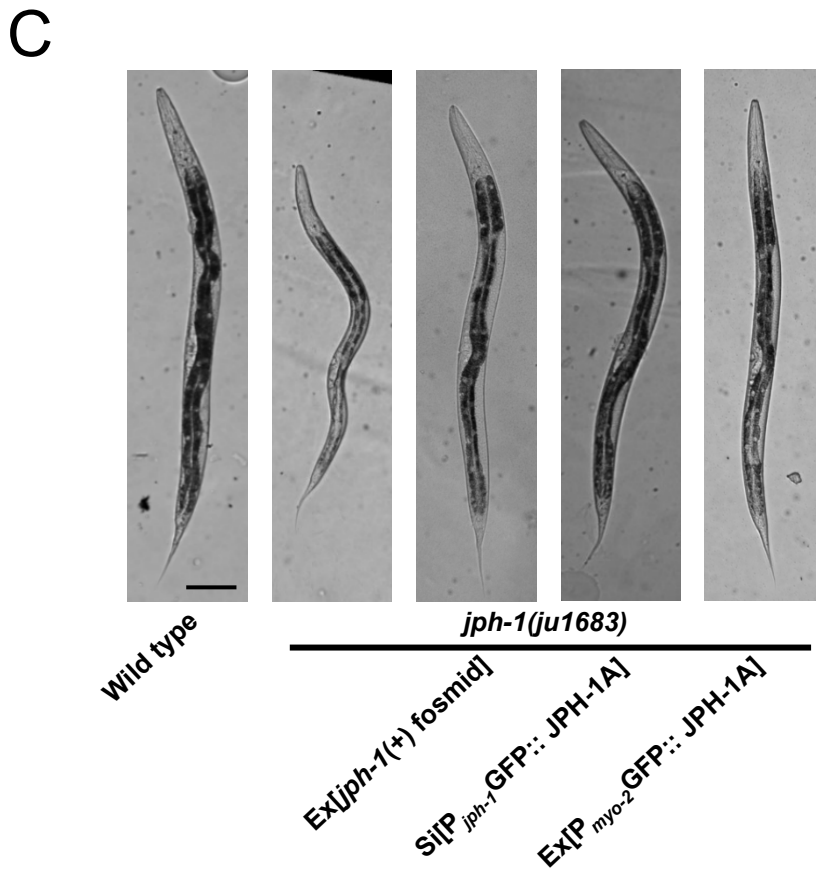

Figure 2

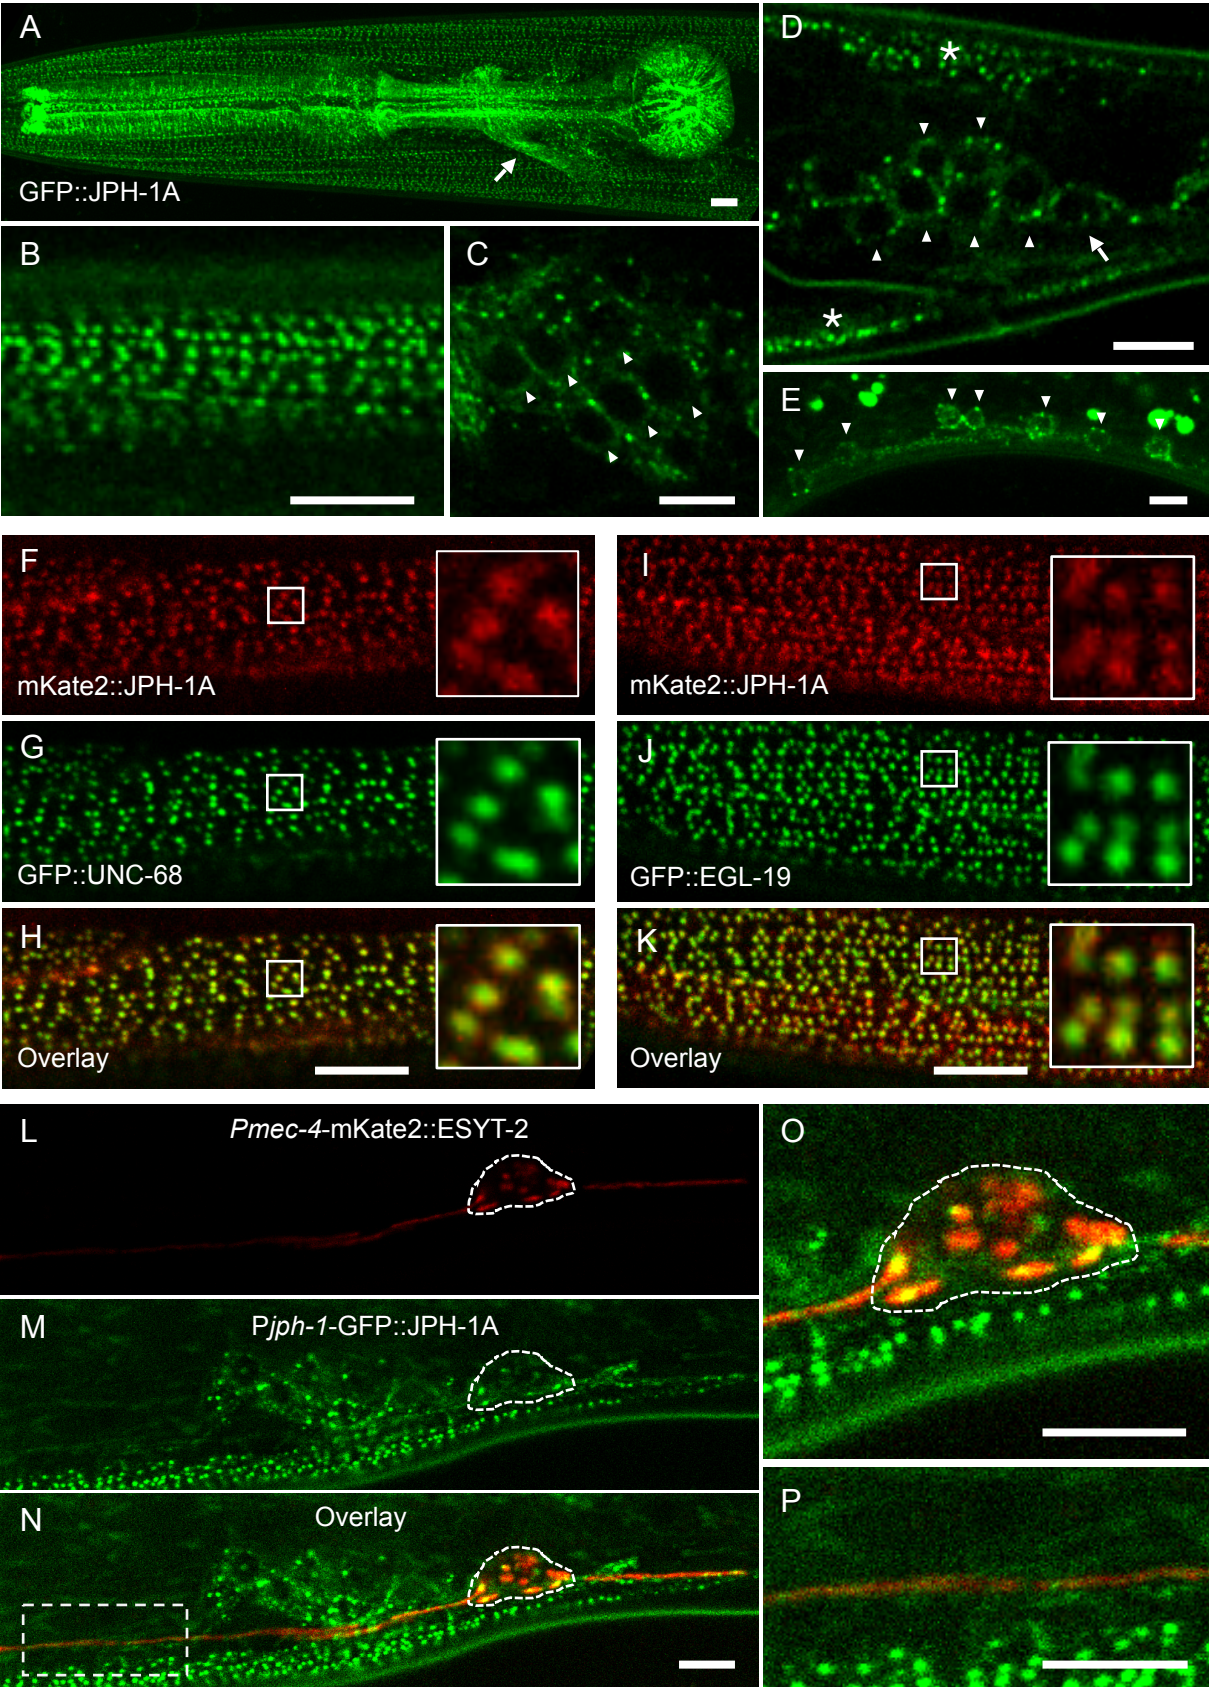

# Figure 3

## A

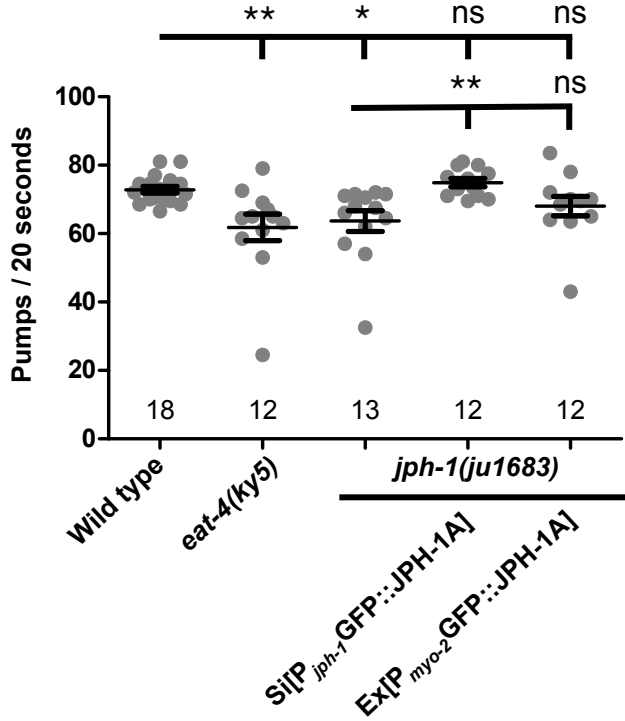

## B

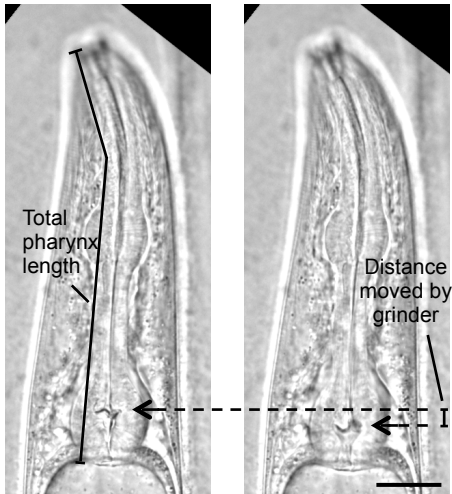

## C

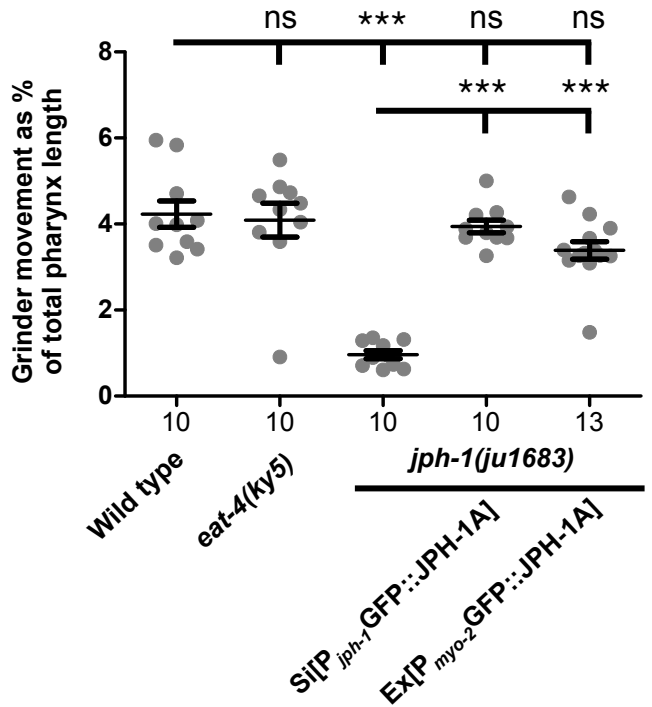

Figure 4

A

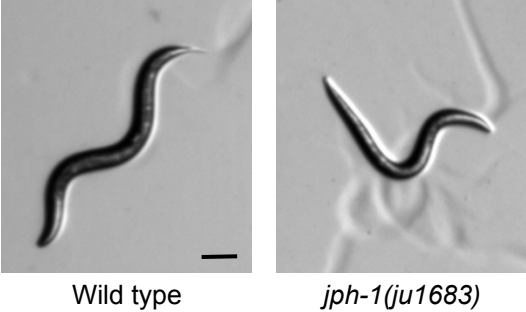

Wild type

*jph-1(ju1683)*

B

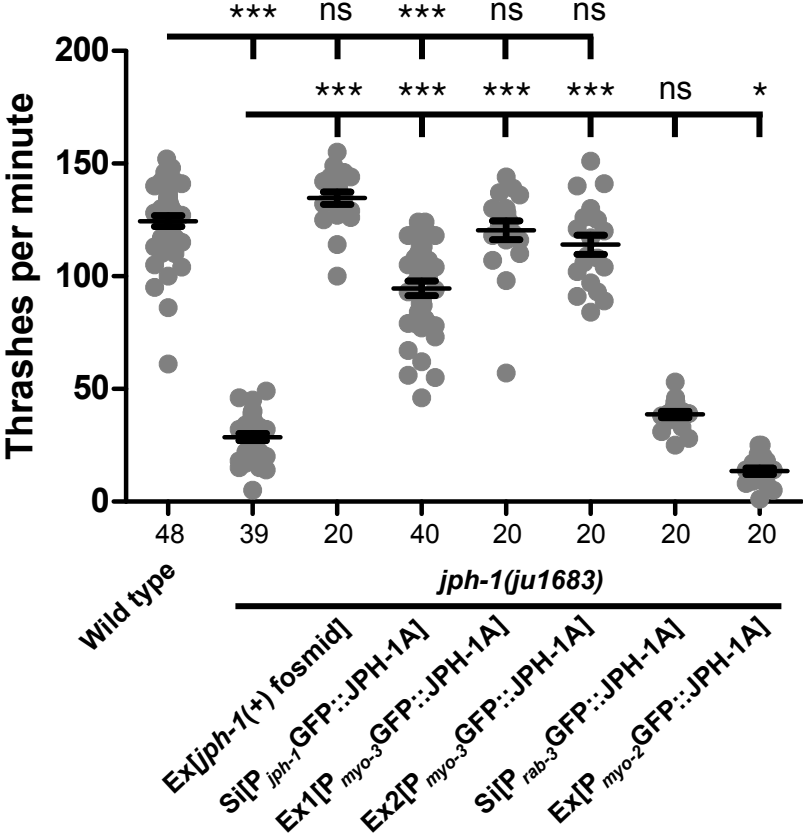

Figure 5

A

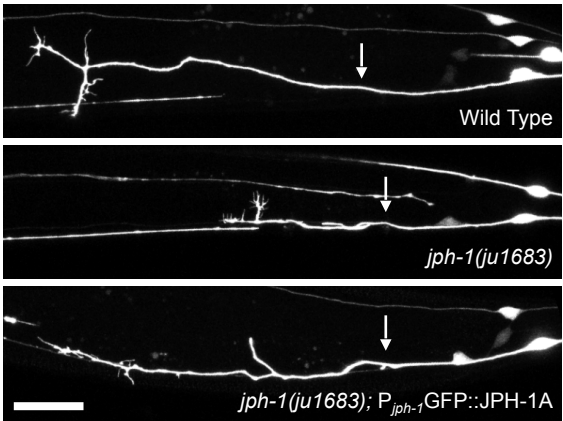

B

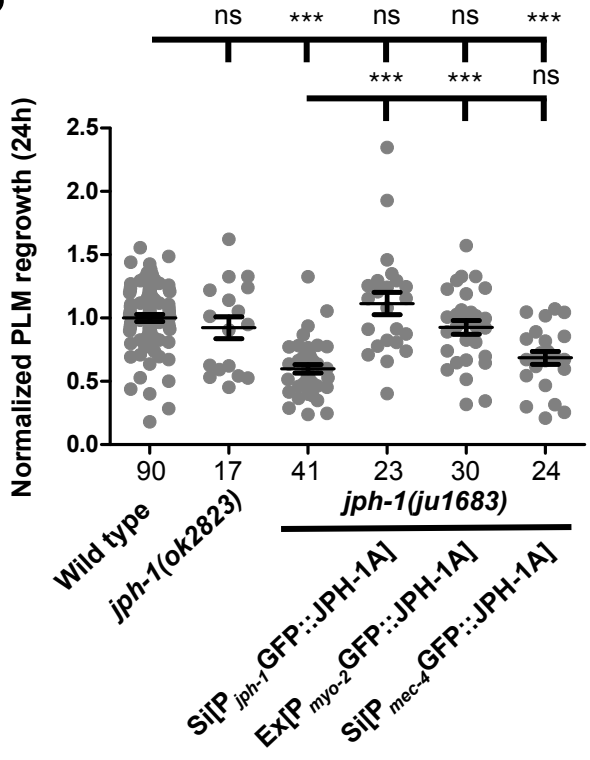

# Figure 6

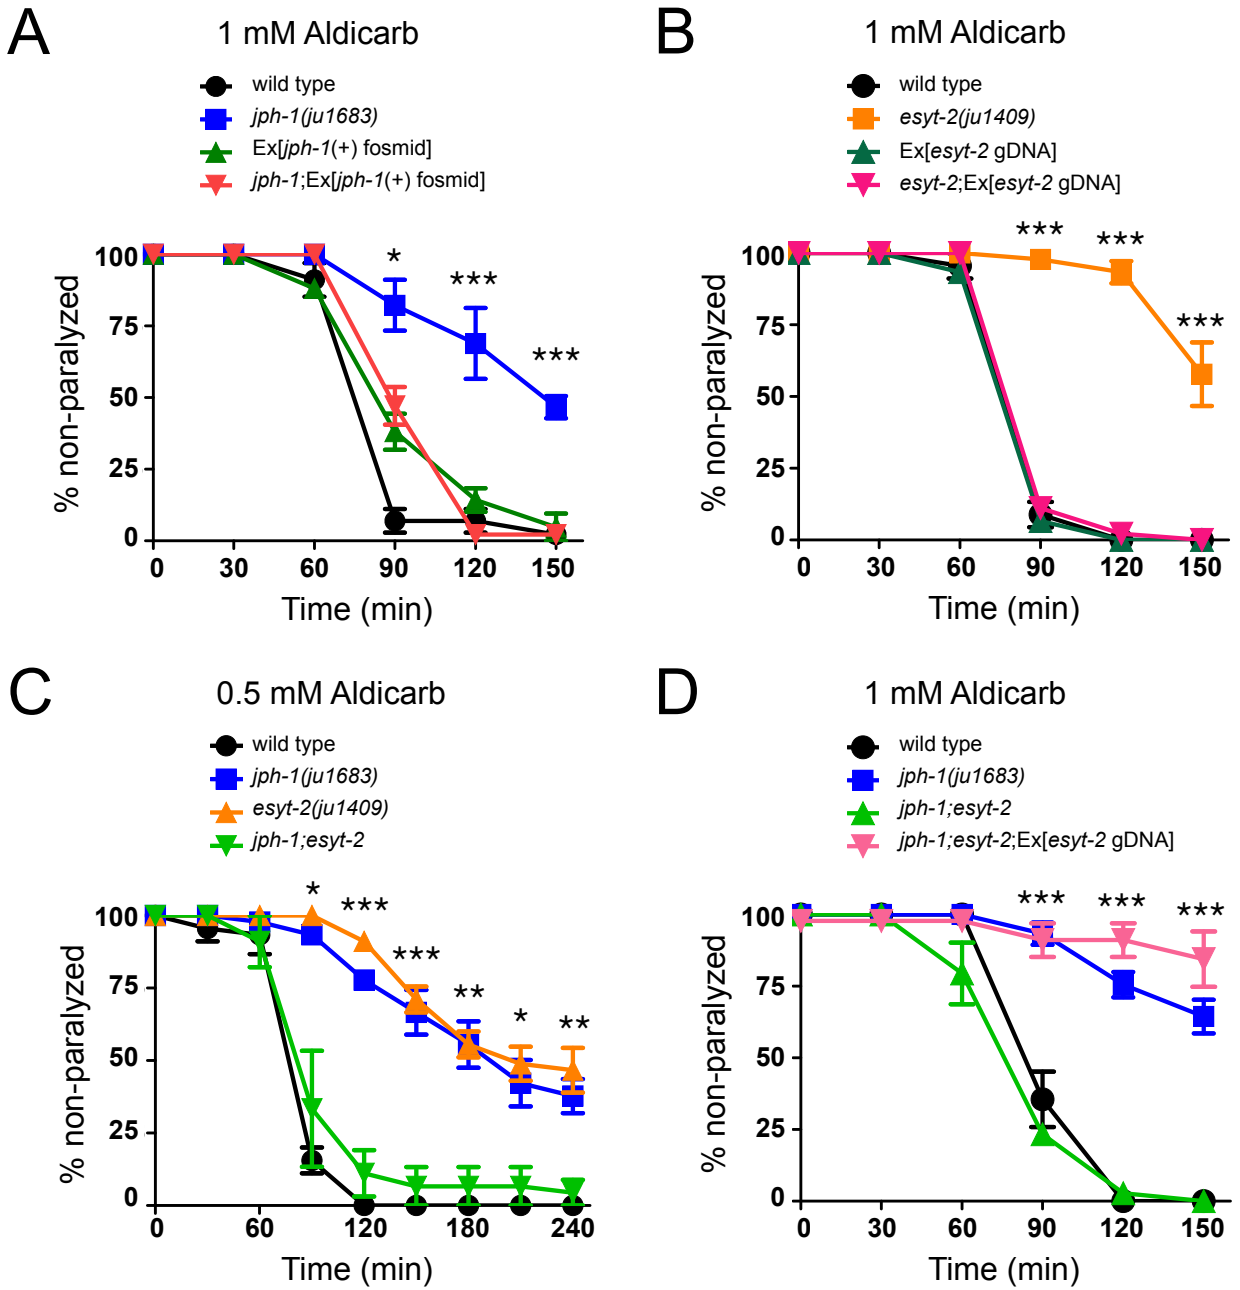

# Figure 7

## A

WT

*unc-2(0)*

*unc-68(0)*

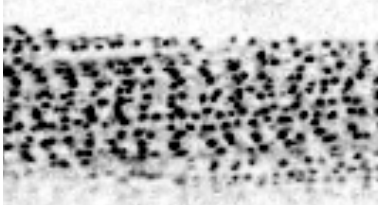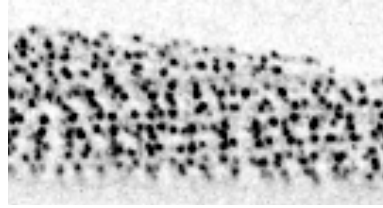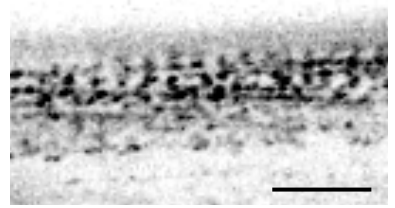

GFP::JPH-1A

## B

WT

*unc-2(0)*

*unc-68(0)*

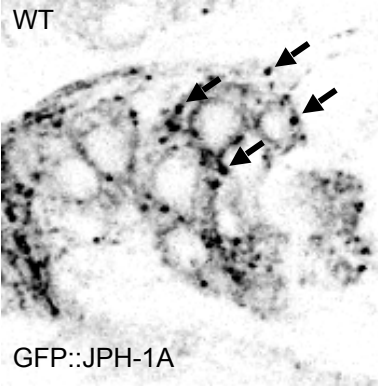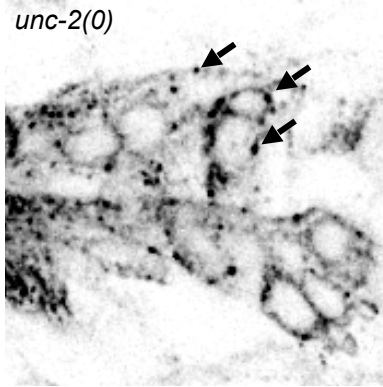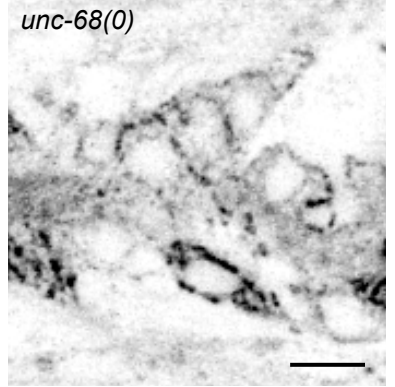

GFP::JPH-1A

# Supplemental Figure 1

## A

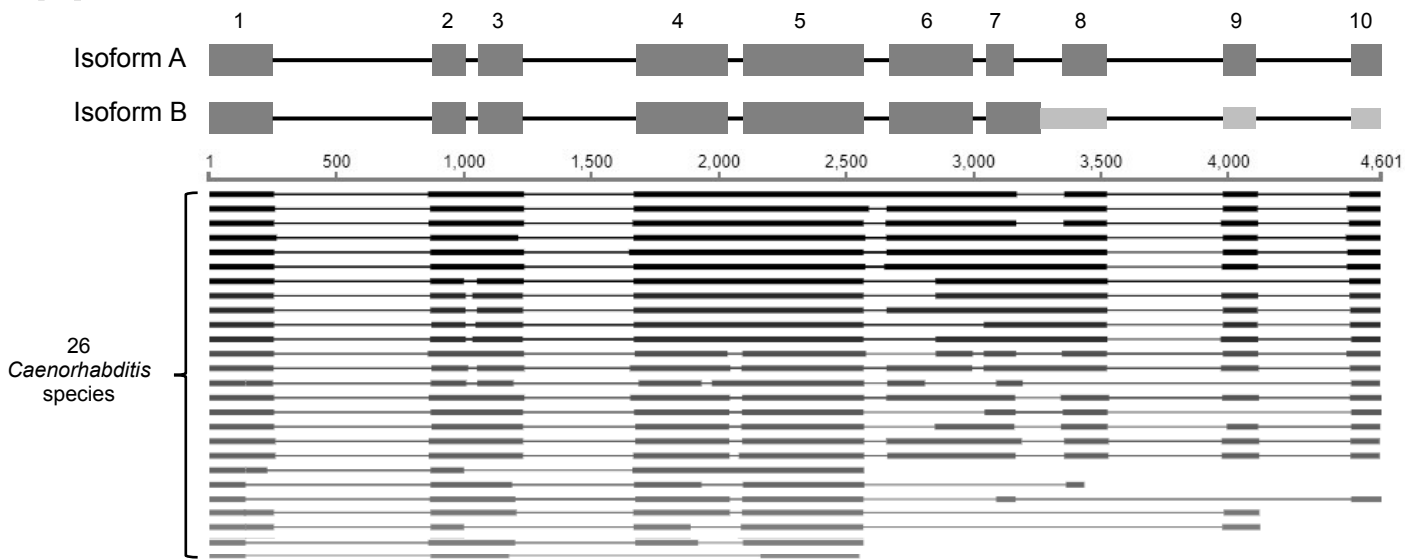

## B

|                                        | 10                                                                                                                                                                | 20 | 30 | 40 | 50 | 60 | 70 |
|----------------------------------------|-------------------------------------------------------------------------------------------------------------------------------------------------------------------|----|----|----|----|----|----|
| <i>C.elegans</i> /1-35                 | VRF . . . VF I E K E E D M N . . . . . T L L F F R Y F A S S F R V Y P V H T L T Y . . . . .                                                                      |    |    |    |    |    |    |
| <i>C.dougherty</i> /1-16               | V S F F F S L H L K R G F E T K . . . . .                                                                                                                         |    |    |    |    |    |    |
| <i>C.sinica</i> /1-14                  | V R F . . . E S L K I E K K K K . . . . .                                                                                                                         |    |    |    |    |    |    |
| <i>C.sp</i> 40/1-7                     | V R F . . . E A L N . . . . .                                                                                                                                     |    |    |    |    |    |    |
| <i>C.sp</i> 26/1-18                    | V R F . . . R E F E L S K R R R . . . . . R F E T K . . . . .                                                                                                     |    |    |    |    |    |    |
| <i>C.sp</i> 39/1-46                    | V R F . . . . I E T S R K E K K E K S V L L L L L F S P L L P R R R F I R P F P P S H I L V V V K W . . . . .                                                     |    |    |    |    |    |    |
| <i>C.nouraguensis</i> /1-33            | V R F . . . . T E T S S R R R . . . . . V F F F F S R S T A R H R F I R F L P H T Y . . . . .                                                                     |    |    |    |    |    |    |
| <i>C.sp</i> 32/1-61                    | V R F . . . . G N E R G R K R R . . . . . T L P F F . C L F A S S D P S L T H T N V V V K W G R E R K E A R R R R E R A Q I D F Q A G G G G G . . . . .           |    |    |    |    |    |    |
| <i>C.afra</i> /1-67                    | V R F . . . . G E R R R G R R R R . . . . . T L L F F F S L L A S F A P S L T H T S V V V K W R R E R K T A R R R R E R A Q I D F Q A G G G G G A G A G . . . . . |    |    |    |    |    |    |
| <i>C.sp</i> 29/1-9                     | V R F . . . . T E T S S R . . . . .                                                                                                                               |    |    |    |    |    |    |
| <i>C.sp</i> 34( <i>nopinata</i> )/1-67 | V S G . . . . E G K R V D H N N T . . . . . F R F S L F S I S S S H S F S H S G T P S H I G R C K V E M E K S G G G E E G I F F F S H S S T P Q D K L N . . . . . |    |    |    |    |    |    |



# Supplemental Figure 2

## A

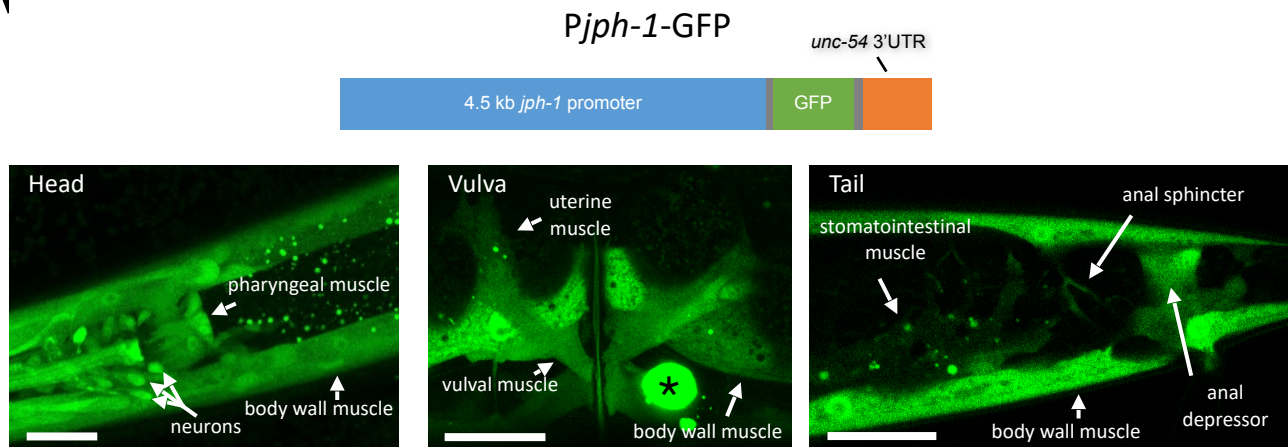

## B

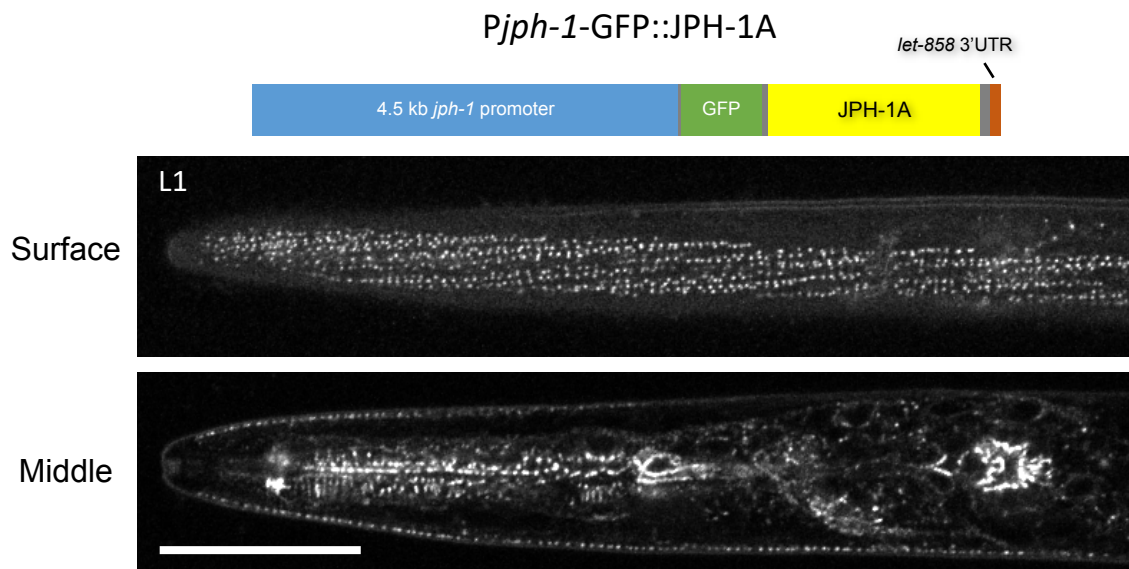

## C

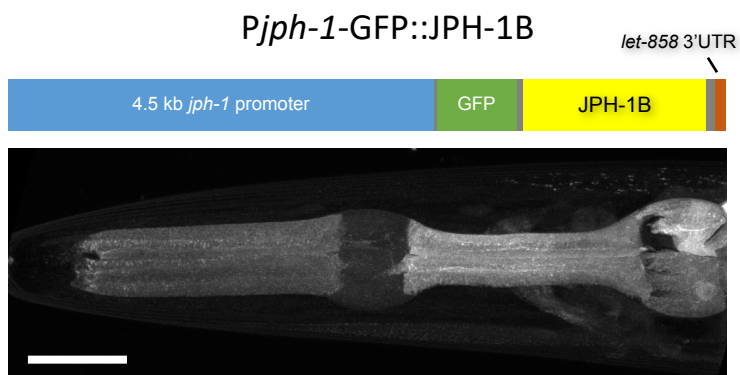

# Supplemental Figure 3

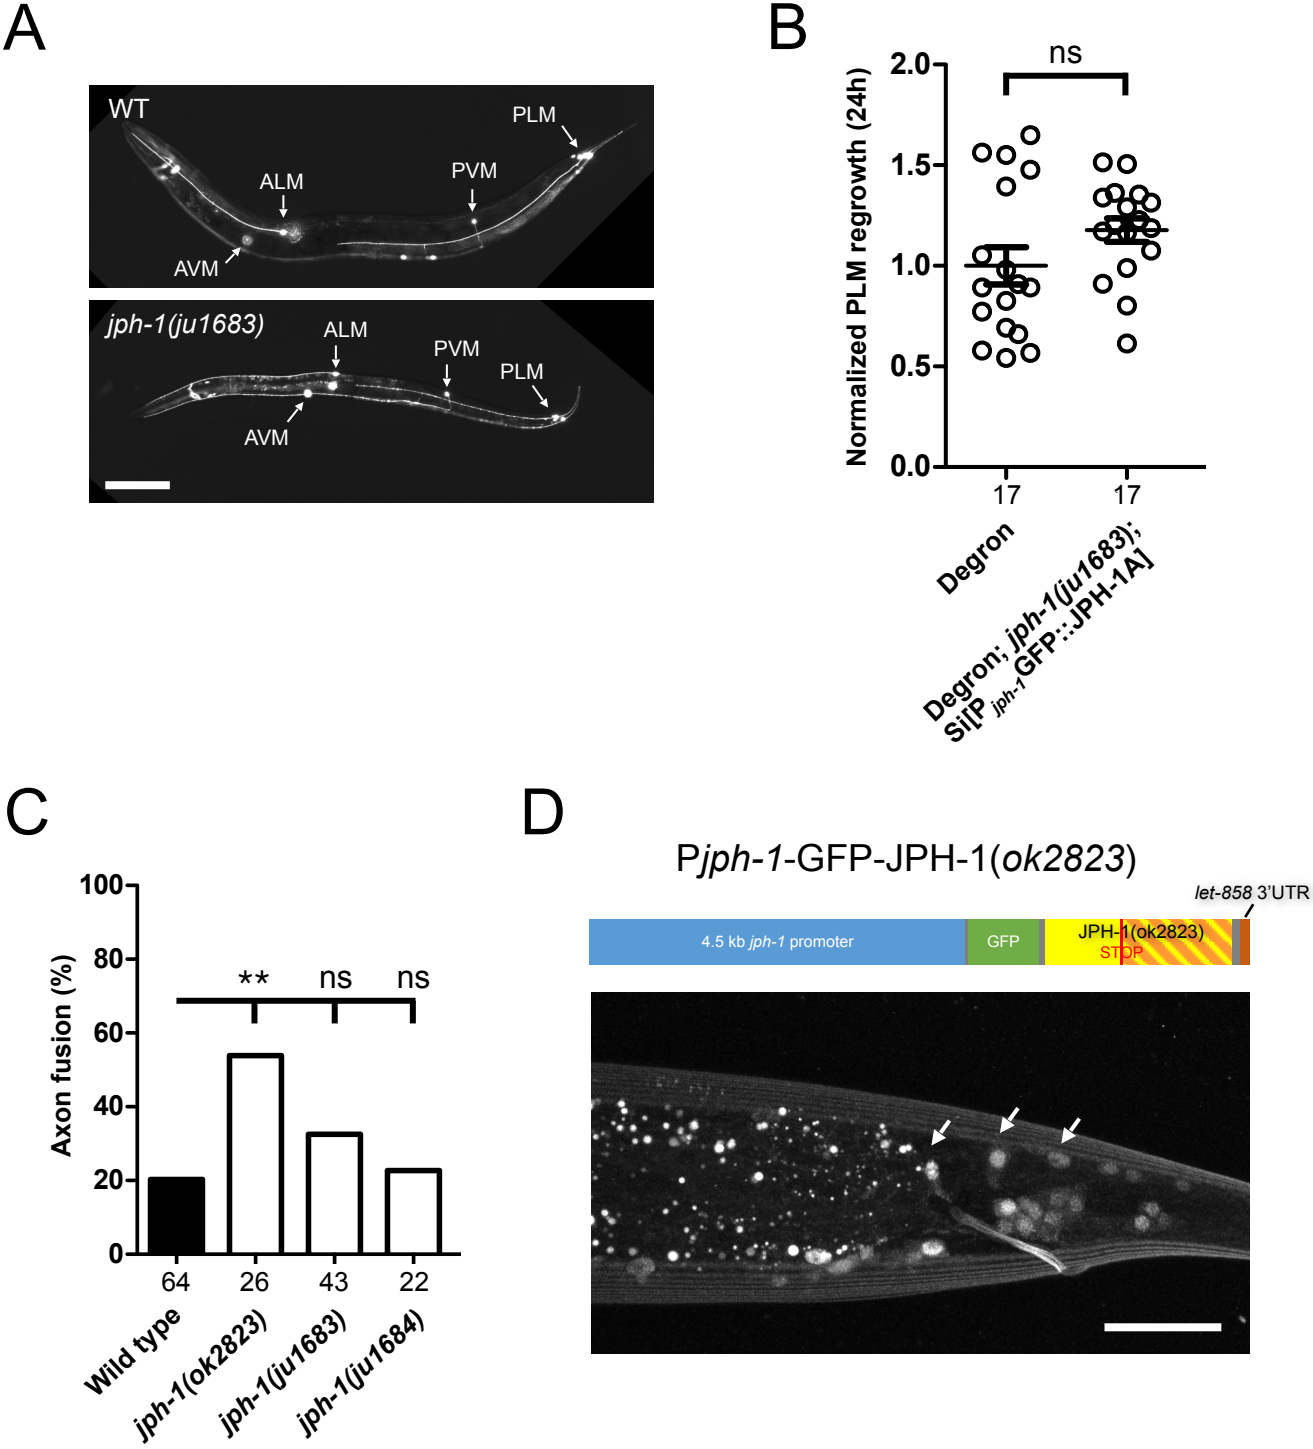

# Supplemental Figure 4

A

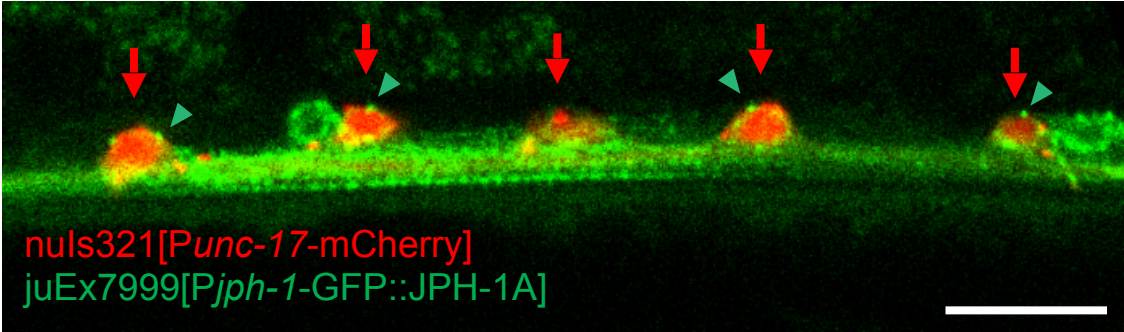

B

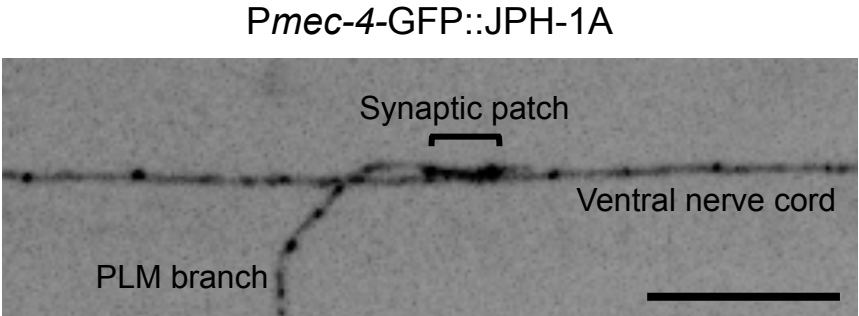

# Supplemental Figure 5

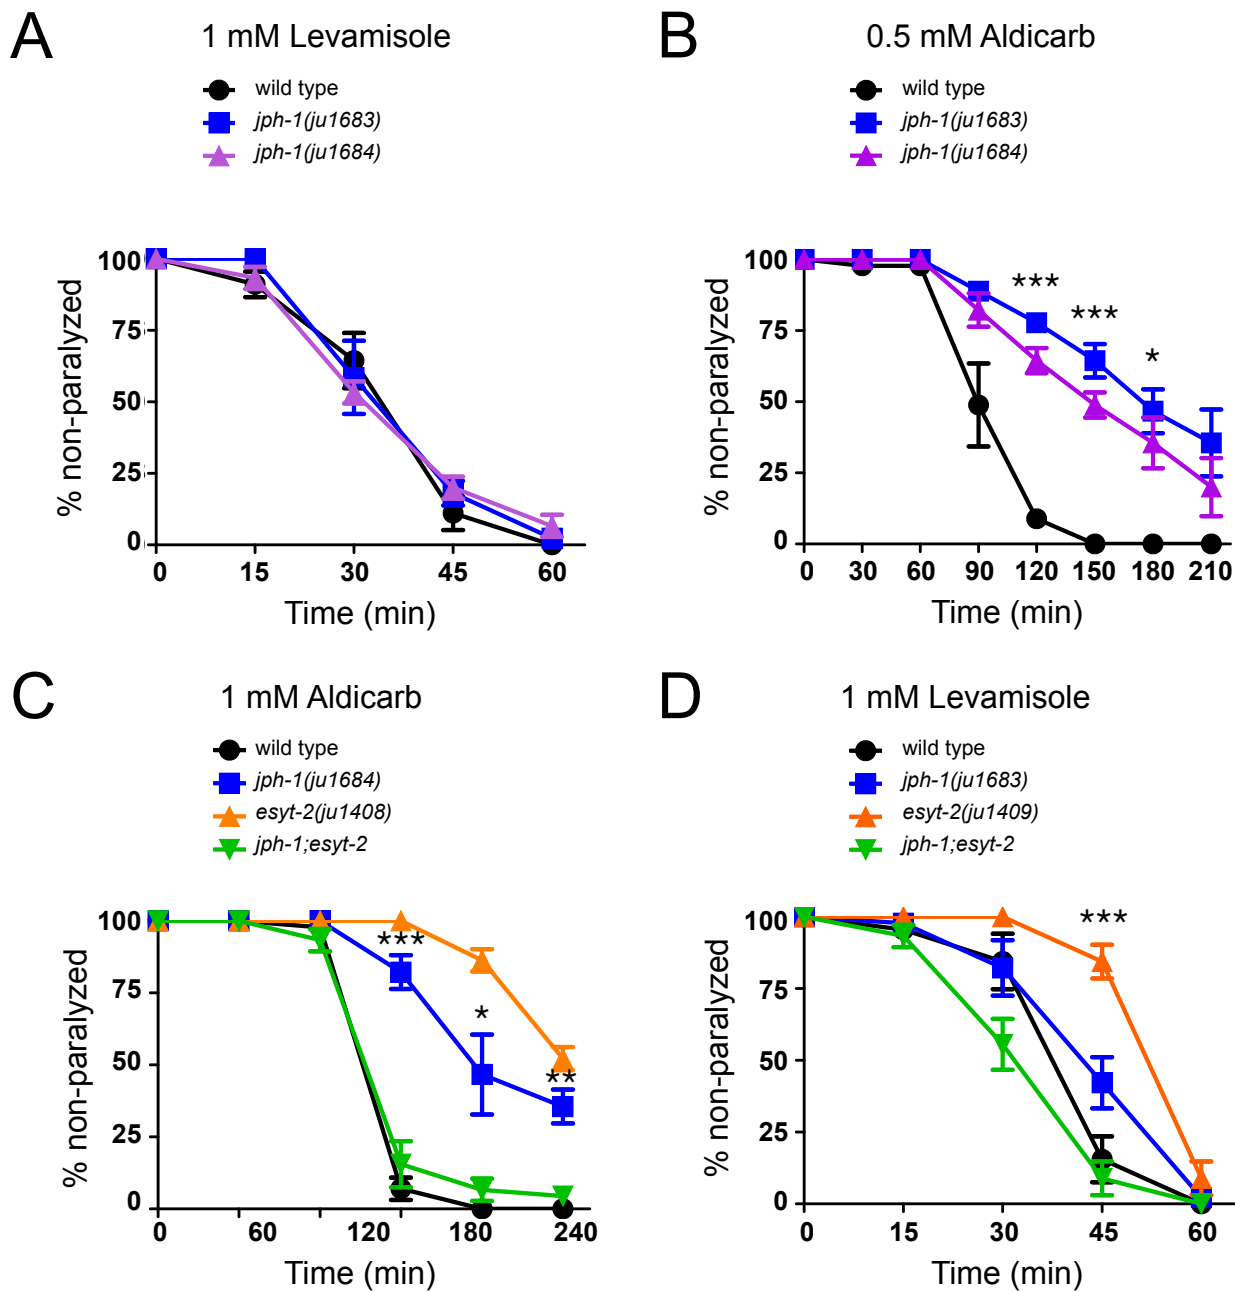

# Supplemental Figure 6

## A

WT

*esyt-2*

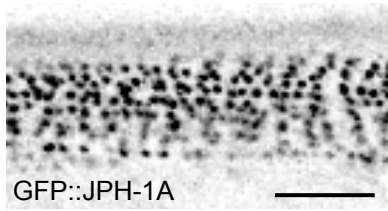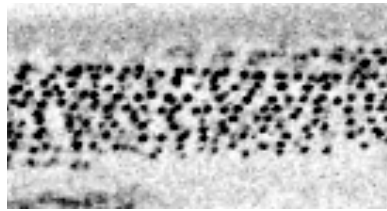

## B

WT

*esyt-2*

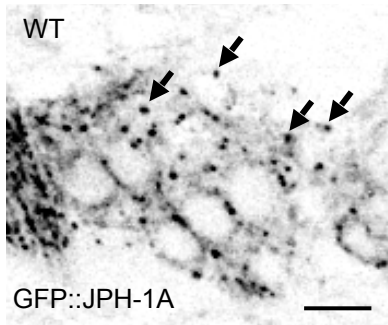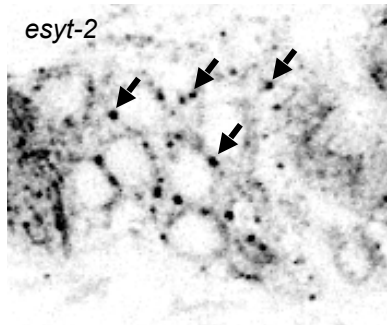

Source: https://www.biorxiv.org/content/10.1101/2020.11.20.392142v1.full.pdf
